# Supplementary material
Source: publisher figshare collection journal article supplement (https://gsapubs.figshare.com/articles/dataset/_/25438687)
Supplement: Supplementary file 1 [file 1]

## Sheet: PlotDat8
Source sheet	data	0.176292	0.0252298	0.159482	0.0235416	0.165215	0.0243358	0.170977	0.0251306	0.176767	0.025926	0.182585	0.026722	0.155308	0.023	0.155598	0.023	0.15502	0.023	0.159197	0.0235416	0.185484	0.0259206	0.176243	0.0252515	0.179859	0.0260029	0.179934	0.0263833	0.180346	0.0259169	0.175061	0.0254898
Plot name	Concordia5	0.168362	0.0244872	0.15947	0.0235504	0.165203	0.0243449	0.170964	0.02514	0.176754	0.0259357	0.182572	0.026732	0.155308	0.023	0.156296	0.0230972	0.155308	0.0230403	0.164919	0.0243358	0.185387	0.0260048	0.176159	0.0253187	0.179774	0.0260735	0.179857	0.0264346	0.180253	0.0260019	0.175009	0.0255253
Plot Type	1	0.171856	0.0252486	0.159437	0.0235584	0.165168	0.0243532	0.170928	0.0251486	0.176716	0.0259446	0.182533	0.0267412	0.156296	0.0231377	0.157284	0.0232346	0.156296	0.0231782	0.17067	0.0251306	0.185114	0.0260739	0.175923	0.0253698	0.179535	0.026128	0.179643	0.0264687	0.179986	0.0260725	0.174862	0.0255505
1st free col	35	0.172783	0.0255481	0.159384	0.0235652	0.165113	0.0243601	0.170871	0.0251558	0.176657	0.025952	0.182472	0.0267488	0.157284	0.0232754	0.158273	0.0233721	0.157284	0.0233161	0.176449	0.025926	0.184669	0.0261266	0.17554	0.0254036	0.179146	0.0261654	0.179295	0.0264848	0.179552	0.0261274	0.174624	0.0255648
Sigma Level	1	0.171387	0.0252617	0.159315	0.0235699	0.165042	0.0243651	0.170797	0.0251609	0.176581	0.0259573	0.182393	0.0267543	0.158273	0.0234131	0.159263	0.0235096	0.158273	0.0234541	0.182256	0.026722	0.184061	0.0261619	0.175018	0.0254197	0.178615	0.026185	0.178821	0.0264827	0.17896	0.0261653	0.174301	0.0255677
Absolute Errs	FALSE	IsoLine	IsoLine	0.159238	0.0235725	0.164961	0.0243677	0.170713	0.0251636	0.176494	0.02596	0.182303	0.0267571	0.159263	0.0235508	0.160254	0.0236471	0.159263	0.023592	IsoLine	IsoLine	0.183302	0.026179	0.174366	0.0254176	0.177953	0.0261863	0.178229	0.0264624	0.178219	0.0261858	0.173903	0.0255592
Symbol Type	1			0.159156	0.0235725	0.164877	0.0243677	0.170626	0.0251636	0.176403	0.02596	0.182209	0.0267571	0.160254	0.0236885	0.161246	0.0237846	0.160254	0.02373			0.182406	0.0261776	0.173597	0.0253973	0.177172	0.0261694	0.177531	0.0264243	0.177346	0.0261882	0.17344	0.0255395
Inverse Plot	FALSE			0.159079	0.0235699	0.164796	0.0243651	0.170542	0.0251609	0.176316	0.0259573	0.182119	0.0267543	0.161246	0.0238263	0.162238	0.0239221	0.161246	0.023868			0.181391	0.0261578	0.172726	0.0253594	0.176288	0.0261346	0.17674	0.0263692	0.176357	0.0261726	0.172925	0.0255092
Color Plot	TRUE			0.15901	0.0235652	0.164725	0.0243601	0.170469	0.0251558	0.17624	0.025952	0.18204	0.0267488	0.162238	0.0239641	0.163232	0.0240597	0.162238	0.024006			0.180277	0.0261199	0.17177	0.0253045	0.175317	0.0260825	0.175873	0.0262981	0.175271	0.0261392	0.172372	0.025469
3D plot	FALSE			0.158957	0.0235584	0.16467	0.0243532	0.170411	0.0251486	0.176181	0.0259446	0.181979	0.0267412	0.163232	0.0241019	0.164226	0.0241972	0.163232	0.0241441			0.179085	0.0260647	0.170748	0.0252337	0.174279	0.0260142	0.174945	0.0262124	0.17411	0.0260888	0.171796	0.02542
Linear	FALSE			0.158923	0.0235504	0.164635	0.0243449	0.170375	0.02514	0.176143	0.0259357	0.18194	0.026732	0.164226	0.0242397	0.165221	0.0243348	0.164226	0.0242821			0.177839	0.0259933	0.169679	0.0251483	0.173194	0.025931	0.173976	0.0261137	0.172895	0.0260223	0.171212	0.0253637
Data Range	E7:I11			0.158912	0.0235416	0.164623	0.0243358	0.170363	0.0251306	0.17613	0.025926	0.181927	0.026722	0.165221	0.0243775	0.166217	0.0244724	0.165221	0.0244202			0.176563	0.025907	0.168585	0.0250501	0.172083	0.0258345	0.172983	0.0260041	0.171652	0.025941	0.170637	0.0253015
				0.158923	0.0235328	0.164635	0.0243267	0.170375	0.0251212	0.176143	0.0259163	0.18194	0.0267121	0.166217	0.0245154	0.167213	0.0246101	0.166217	0.0245583			0.175282	0.0258075	0.167486	0.0249409	0.170967	0.0257266	0.171986	0.0258855	0.170403	0.0258464	0.170086	0.0252351
				0.158957	0.0235247	0.16467	0.0243183	0.170411	0.0251126	0.176181	0.0259074	0.181979	0.0267029	0.167213	0.0246533	0.168211	0.0247477	0.167213	0.0246964			0.17402	0.0256968	0.166405	0.0248229	0.169869	0.0256094	0.171005	0.0257604	0.169173	0.0257405	0.169575	0.0251664
				0.15901	0.023518	0.164725	0.0243114	0.170469	0.0251054	0.17624	0.0259	0.18204	0.0266953	0.168211	0.0247912	0.169209	0.0248854	0.168211	0.0248346			0.172803	0.0255769	0.165361	0.0246984	0.168809	0.0254852	0.170058	0.0256312	0.167986	0.0256252	0.169117	0.0250972
				0.159079	0.0235132	0.164796	0.0243064	0.170542	0.0251003	0.176316	0.0258947	0.182119	0.0266898	0.169209	0.0249291	0.170209	0.0250231	0.169209	0.0249727			0.171653	0.0254504	0.164376	0.0245697	0.167809	0.0253564	0.169165	0.0255004	0.166866	0.0255029	0.168724	0.0250294
				0.159156	0.0235107	0.164877	0.0243038	0.170626	0.0250976	0.176403	0.025892	0.182209	0.026687	0.170209	0.025067	0.171209	0.0251608	0.170209	0.0251109			0.170594	0.0253195	0.163469	0.0244395	0.166888	0.0252254	0.168341	0.0253704	0.165833	0.0253759	0.168408	0.0249648
				0.159238	0.0235107	0.164961	0.0243038	0.170713	0.0250976	0.176494	0.025892	0.182303	0.026687	0.171209	0.0252049	0.17221	0.0252985	0.171209	0.0252491			0.169645	0.0251869	0.162656	0.0243101	0.166063	0.025095	0.167605	0.025244	0.164909	0.0252467	0.168177	0.0249053
				0.159315	0.0235132	0.165042	0.0243064	0.170797	0.0251003	0.176581	0.0258947	0.182393	0.0266898	0.17221	0.0253429	0.173212	0.0254362	0.17221	0.0253873			0.168826	0.0250551	0.161955	0.0241843	0.165351	0.0249675	0.166969	0.0251235	0.16411	0.0251178	0.168038	0.0248524
				0.159384	0.023518	0.165113	0.0243114	0.170871	0.0251054	0.176657	0.0259	0.182472	0.0266953	0.173212	0.0254809	0.174215	0.025574	0.173212	0.0255255			0.168152	0.0249267	0.161379	0.0240643	0.164765	0.0248454	0.166446	0.0250112	0.163454	0.0249916	0.167993	0.0248076
				0.159437	0.0235247	0.165168	0.0243183	0.170928	0.0251126	0.176716	0.0259074	0.182533	0.0267029	0.174215	0.0256189	0.175218	0.0257118	0.174215	0.0256638			0.167637	0.0248042	0.160938	0.0239525	0.164318	0.0247313	0.166047	0.0249094	0.162951	0.0248707	0.168046	0.0247721
				0.15947	0.0235328	0.165203	0.0243267	0.170964	0.0251212	0.176754	0.0259163	0.182572	0.0267121	0.175218	0.0257569	0.176223	0.0258496	0.175218	0.0258021			0.16729	0.0246901	0.160642	0.0238512	0.164017	0.0246272	0.165778	0.02482	0.162613	0.0247575	0.168193	0.0247469
				0.159482	0.0235416	0.165215	0.0243358	0.170977	0.0251306	0.176767	0.025926	0.182585	0.026722	0.176223	0.025895	0.177228	0.0259874	0.176223	0.0259403			0.167118	0.0245864	0.160496	0.0237622	0.163869	0.0245352	0.165646	0.0247448	0.162446	0.024654	0.168431	0.0247326
				ConcTikEll	ConcTikEll	ConcTikEll	ConcTikEll	ConcTikEll	ConcTikEll	ConcTikEll	ConcTikEll	ConcTikEll	ConcTikEll	0.177228	0.026033	0.178234	0.0261252	0.177228	0.0260786			0.167125	0.0244952	0.160503	0.0236874	0.163876	0.024457	0.165653	0.0246852	0.162453	0.0245624	0.168753	0.0247297
														0.178234	0.0261711	0.179241	0.0262631	0.178234	0.026217			0.16731	0.0244183	0.160664	0.0236281	0.164039	0.0243943	0.165799	0.0246424	0.162633	0.0244844	0.169151	0.0247382
														0.179241	0.0263092	0.180249	0.0264009	0.179241	0.0263553			0.167671	0.0243573	0.160974	0.0235855	0.164354	0.0243482	0.166081	0.0246172	0.162984	0.0244215	0.169614	0.0247579
														0.180249	0.0264473	0.181258	0.0265388	0.180249	0.0264937			0.168198	0.0243132	0.161428	0.0235605	0.164815	0.0243197	0.166493	0.0246102	0.163499	0.024375	0.170129	0.0247882
														0.181258	0.0265854	0.182267	0.0266767	0.181258	0.0266321			0.168884	0.0242869	0.162016	0.0235535	0.165413	0.0243092	0.167027	0.0246214	0.164167	0.0243457	0.170683	0.0248284
														0.182267	0.0267236	0.183278	0.0268147	0.182267	0.0267704			0.169713	0.0242791	0.162729	0.0235647	0.166136	0.024317	0.167674	0.0246507	0.164975	0.0243343	0.171259	0.0248774
														0.183278	0.0268618	0.184289	0.0269526	0.183278	0.0269089			0.170671	0.0242897	0.163551	0.0235939	0.166971	0.0243429	0.16842	0.0246974	0.165909	0.0243409	0.171842	0.0249337
														0.184289	0.027	0.184637	0.027	0.183944	0.027			0.171738	0.0243186	0.164466	0.0236404	0.1679	0.0243865	0.169251	0.0247607	0.166949	0.0243654	0.172417	0.0249959
														0.184289	0.027	ConcBand	ConcBand	ConcBand	ConcBand			0.172894	0.0243652	0.165458	0.0237034	0.168907	0.0244468	0.170151	0.0248393	0.168075	0.0244074	0.172968	0.0250623
														IsoLine	IsoLine							0.174115	0.0244287	0.166506	0.0237817	0.169971	0.0245227	0.171102	0.0249317	0.169266	0.024466	0.17348	0.025131
																						0.17538	0.0245078	0.16759	0.0238737	0.171072	0.0246128	0.172085	0.0250361	0.170498	0.0245401	0.173938	0.0252002
																						0.176661	0.0246009	0.168689	0.0239777	0.172188	0.0247153	0.173083	0.0251505	0.171748	0.0246283	0.17433	0.025268
																						0.177936	0.0247063	0.169782	0.0240915	0.173298	0.0248281	0.174074	0.0252726	0.17299	0.0247287	0.174646	0.0253325
																						0.179179	0.0248218	0.170847	0.0242131	0.174379	0.0249491	0.17504	0.0254001	0.174201	0.0248396	0.174877	0.0253921
																						0.180365	0.0249453	0.171863	0.02434	0.175412	0.0250759	0.175963	0.0255304	0.175358	0.0249587	0.175017	0.025445
																						0.181472	0.0250744	0.172812	0.0244698	0.176375	0.0252061	0.176823	0.0256611	0.176437	0.0250836	0.175061	0.0254898
																						0.182479	0.0252064	0.173674	0.0245999	0.17725	0.0253371	0.177605	0.0257896	0.177418	0.0252121
																						0.183365	0.025339	0.174432	0.0247278	0.178021	0.0254664	0.178293	0.0259134	0.178281	0.0253415
																						0.184113	0.0254694	0.175073	0.024851	0.178671	0.0255915	0.178874	0.0260301	0.17901	0.0254693
																						0.184709	0.0255951	0.175583	0.0249672	0.179189	0.0257099	0.179336	0.0261374	0.179591	0.0255931
																						0.185141	0.0257137	0.175952	0.025074	0.179564	0.0258193	0.179671	0.0262332	0.180013	0.0257105
																						0.185401	0.0258229	0.176173	0.0251694	0.179789	0.0259176	0.179871	0.0263157	0.180266	0.0258191
																						0.185484	0.0259206	0.176243	0.0252515	0.179859	0.0260029	0.179934	0.0263833	0.180346	0.0259169
																						Red	Red	Red	Red	Red	Red	Red	Red	Red	Red

## Sheet: PlotDat11
Source sheet	data	5.4258	0.339331	4.8	0.319011	4.77208	0.318009	4.83944	0.305	5.5639	0.344217	5.49334	0.340713	5.47089	0.340971	5.46526	0.34461	5.53563	0.347217	5.46341	0.342523	5.52267	0.349188	5.39206	0.340055	5.51521	0.341614	5.51891	0.342425	5.32291	0.332094	5.69817	0.353637	5.55409	0.345478	5.65168	0.351911	5.56594	0.343887	5.48277	0.34375	5.68989	0.351025	5.49297	0.341693	5.40542	0.340383	5.5467	0.34479
Plot name	Concordia11	5.36207	0.336115	4.8	0.319011	4.8869	0.322105	5.87105	0.37	5.56198	0.345219	5.49152	0.341656	5.46908	0.341915	5.46345	0.345565	5.53377	0.348191	5.46163	0.34347	5.52082	0.350156	5.39021	0.34101	5.51324	0.342566	5.51706	0.343372	5.32105	0.33303	5.6963	0.354632	5.5522	0.346454	5.64982	0.352885	5.56414	0.344845	5.48096	0.344701	5.68786	0.352004	5.49119	0.342638	5.40362	0.341334	5.54489	0.345745
Plot Type	1	5.34112	0.336369	4.83484	0.320256	5.00401	0.326213			5.55634	0.346061	5.48616	0.342448	5.46379	0.342707	5.45816	0.346366	5.5283	0.349009	5.45642	0.344266	5.5154	0.35097	5.38479	0.341813	5.50747	0.343365	5.51162	0.344167	5.3156	0.333815	5.69084	0.355467	5.54665	0.347274	5.64436	0.353702	5.55884	0.345649	5.47567	0.3455	5.68189	0.352826	5.48598	0.343431	5.39834	0.342132	5.53959	0.346548
1st free col	53	5.33552	0.339954	4.86988	0.321502	5.12344	0.330334			5.54715	0.346719	5.47742	0.343067	5.45514	0.343327	5.44952	0.346993	5.51938	0.349649	5.44792	0.344888	5.50656	0.351605	5.37593	0.34244	5.49804	0.34399	5.50275	0.344788	5.30671	0.33443	5.68193	0.35612	5.53759	0.347915	5.63546	0.354341	5.55019	0.346277	5.46703	0.346124	5.67215	0.353469	5.47748	0.344051	5.38973	0.342757	5.53093	0.347175
Sigma Level	1	5.40164	0.342464	4.90514	0.322749	5.24525	0.334468			5.53464	0.347175	5.46553	0.343496	5.44339	0.343756	5.43776	0.347428	5.50724	0.350093	5.43635	0.34532	5.49453	0.352046	5.36389	0.342875	5.48522	0.344424	5.49069	0.345219	5.29462	0.334856	5.66981	0.356573	5.52527	0.34836	5.62335	0.354785	5.53843	0.346713	5.45528	0.346557	5.6589	0.353915	5.46592	0.344482	5.37802	0.34319	5.51916	0.34761
Absolute Errs	FALSE	5.33571	0.3379	4.94061	0.323997	5.36948	0.338614			5.51917	0.347417	5.45082	0.343724	5.42885	0.343985	5.42323	0.347659	5.49223	0.350329	5.42204	0.345549	5.47965	0.352281	5.34899	0.343106	5.46936	0.344654	5.47577	0.345448	5.27965	0.335083	5.65482	0.356814	5.51003	0.348596	5.60836	0.35502	5.52389	0.346945	5.44074	0.346787	5.6425	0.354152	5.45161	0.34471	5.36354	0.343419	5.50459	0.347841
Symbol Type	1	5.38986	0.344465	4.97629	0.325247	5.49618	0.342774			5.50114	0.347439	5.43369	0.343745	5.41191	0.344005	5.40629	0.347679	5.47474	0.35035	5.40537	0.345569	5.46231	0.352302	5.33164	0.343127	5.45088	0.344675	5.45838	0.345469	5.26223	0.335103	5.63736	0.356835	5.49227	0.348617	5.59091	0.355041	5.50695	0.346965	5.42381	0.346808	5.62341	0.354174	5.43495	0.34473	5.34667	0.34344	5.48763	0.347862
Inverse Plot	FALSE	5.25909	0.335397	5.01219	0.326497	5.62541	0.346946			5.48107	0.34724	5.41461	0.343557	5.39305	0.343817	5.38743	0.347489	5.45526	0.350156	5.38681	0.345381	5.44301	0.352109	5.3123	0.342936	5.43029	0.344486	5.43902	0.345281	5.24281	0.334917	5.61791	0.356637	5.4725	0.348423	5.57146	0.354847	5.48808	0.346775	5.40495	0.346618	5.60213	0.35398	5.41639	0.344542	5.32787	0.343251	5.46873	0.347672
Color Plot	TRUE	5.37359	0.336974	5.0483	0.327749	5.7572	0.351132			5.45948	0.346825	5.39409	0.343167	5.37276	0.343426	5.36715	0.347094	5.43431	0.349752	5.36685	0.344988	5.42225	0.351708	5.29152	0.342541	5.40816	0.344092	5.4182	0.344889	5.22194	0.334529	5.59699	0.356225	5.45123	0.348019	5.55056	0.354444	5.46779	0.346378	5.38468	0.346224	5.57926	0.353574	5.39644	0.344151	5.30767	0.342857	5.44841	0.347276
3D plot	FALSE	5.38571	0.337809	5.08462	0.329002	5.89162	0.35533			5.43698	0.346205	5.3727	0.342584	5.35162	0.342843	5.34601	0.346503	5.41248	0.34915	5.34604	0.344402	5.40061	0.351109	5.26985	0.34195	5.38508	0.343504	5.39649	0.344304	5.20017	0.333951	5.57519	0.35561	5.42907	0.347415	5.52877	0.353842	5.44663	0.345786	5.36354	0.345636	5.55541	0.352969	5.37563	0.343567	5.2866	0.342269	5.42723	0.346685
Linear	FALSE	5.18935	0.327531	5.12117	0.330256	IsoLine	IsoLine			5.41417	0.345398	5.35102	0.341824	5.33018	0.342083	5.32458	0.345734	5.39035	0.348365	5.32495	0.343638	5.37867	0.350329	5.24789	0.341181	5.36169	0.342738	5.3745	0.343541	5.17812	0.333197	5.55309	0.354808	5.4066	0.346629	5.50668	0.353058	5.4252	0.345015	5.34212	0.34487	5.53124	0.352181	5.35455	0.342805	5.26525	0.341503	5.40576	0.345915
Data Range	E10:H30	5.56438	0.348785	5.15794	0.331512					5.39168	0.344425	5.32964	0.340909	5.30905	0.341167	5.30345	0.344807	5.36852	0.347419	5.30415	0.342718	5.35704	0.349389	5.22623	0.340254	5.33863	0.341814	5.3528	0.342622	5.15636	0.332289	5.53131	0.353843	5.38444	0.345681	5.4849	0.352113	5.40406	0.344085	5.32099	0.343947	5.5074	0.351232	5.33376	0.341888	5.2442	0.34058	5.38459	0.344987
Filled Symbols	FALSE	5.41805	0.340717	5.19492	0.332768					5.37012	0.343314	5.30915	0.339863	5.28879	0.34012	5.2832	0.343748	5.3476	0.346338	5.28421	0.341667	5.33631	0.348315	5.20547	0.339194	5.31652	0.340759	5.332	0.341573	5.13551	0.331251	5.51042	0.352739	5.36321	0.344598	5.46402	0.351033	5.38379	0.343023	5.30074	0.342892	5.48455	0.350146	5.31383	0.34084	5.22401	0.339526	5.3643	0.343927
ConcAge	FALSE	5.51795	0.347163	5.23213	0.334026					5.35008	0.342094	5.2901	0.338715	5.26996	0.338971	5.26437	0.342586	5.32816	0.345151	5.26568	0.340513	5.31703	0.347135	5.18617	0.338031	5.29596	0.3396	5.31267	0.34042	5.11613	0.330112	5.491	0.351527	5.34346	0.34341	5.44462	0.349847	5.36496	0.341857	5.28191	0.341734	5.46331	0.348954	5.2953	0.33969	5.20525	0.338368	5.34544	0.342763
ConcSwap	FALSE	5.43614	0.339217	5.26957	0.335285					5.3321	0.340798	5.27301	0.337496	5.25307	0.337751	5.24748	0.341351	5.31072	0.343891	5.24906	0.339288	5.29975	0.345883	5.16886	0.336796	5.27753	0.338369	5.29533	0.339196	5.09874	0.328902	5.47359	0.350241	5.32576	0.342147	5.42721	0.348589	5.34806	0.340619	5.26503	0.340504	5.44425	0.347689	5.27869	0.338468	5.18843	0.337139	5.32852	0.341528
1st Symbol-row	1	5.35305	0.339111	5.30722	0.336545					5.31668	0.339462	5.25835	0.336239	5.23858	0.336493	5.233	0.340079	5.29576	0.342592	5.23481	0.338024	5.28492	0.344592	5.15401	0.335523	5.26171	0.337101	5.28046	0.337934	5.08383	0.327655	5.45865	0.348915	5.31057	0.340846	5.41228	0.347291	5.33357	0.339342	5.25054	0.339236	5.42791	0.346385	5.26444	0.337209	5.17399	0.335872	5.314	0.340254
		5.54353	0.346254	5.34511	0.337806					5.30424	0.338123	5.24652	0.334979	5.22688	0.335232	5.22131	0.338803	5.28368	0.34129	5.2233	0.336758	5.27295	0.343298	5.14203	0.334247	5.24895	0.335829	5.26846	0.336669	5.07179	0.326404	5.4466	0.347585	5.29831	0.339541	5.40023	0.34599	5.32187	0.338063	5.23886	0.337965	5.41471	0.345076	5.25293	0.335946	5.16235	0.334601	5.30229	0.338977
		5.36531	0.337085	5.38322	0.339069					5.29511	0.336817	5.23785	0.33375	5.21831	0.334002	5.21273	0.337558	5.27483	0.34002	5.21486	0.335522	5.26417	0.342036	5.13324	0.333001	5.23958	0.334588	5.25965	0.335435	5.06296	0.325184	5.43776	0.346288	5.28932	0.338269	5.39139	0.344721	5.31329	0.336814	5.23028	0.336725	5.40503	0.343801	5.2445	0.334714	5.1538	0.333362	5.2937	0.337731
		5.27614	0.335747	5.42156	0.340332					5.28955	0.335579	5.23256	0.332585	5.21308	0.332837	5.20751	0.336379	5.26943	0.338816	5.20972	0.334352	5.25883	0.340839	5.12789	0.331822	5.23387	0.333412	5.25428	0.334266	5.05758	0.324029	5.43237	0.34506	5.28384	0.337063	5.386	0.343518	5.30807	0.335632	5.22506	0.335551	5.39913	0.342591	5.23936	0.333547	5.1486	0.332187	5.28847	0.33655
		5.41672	0.340129	5.46013	0.341597					5.2877	0.334444	5.2308	0.331517	5.21135	0.331768	5.20577	0.335297	5.26764	0.337712	5.20802	0.333278	5.25705	0.339742	5.12611	0.330739	5.23197	0.332334	5.2525	0.333194	5.05579	0.322968	5.43059	0.343932	5.28202	0.335957	5.38422	0.342415	5.30633	0.334547	5.22333	0.334473	5.39717	0.341482	5.23765	0.332477	5.14687	0.33111	5.28673	0.335468
		5.44014	0.340663	5.49893	0.342863					5.28963	0.333442	5.23263	0.330574	5.21315	0.330824	5.20758	0.334343	5.2695	0.336737	5.20979	0.33233	5.2589	0.338774	5.12796	0.329784	5.23394	0.331382	5.25435	0.332247	5.05765	0.322032	5.43245	0.342937	5.28391	0.334981	5.38608	0.341441	5.30814	0.333589	5.22513	0.333522	5.3992	0.340503	5.23943	0.331532	5.14867	0.330159	5.28854	0.334512
		IsoLine	IsoLine	5.53796	0.34413					5.29526	0.3326	5.23798	0.329782	5.21845	0.330032	5.21288	0.333541	5.27497	0.335919	5.21501	0.331534	5.26432	0.33796	5.13338	0.328982	5.23971	0.330583	5.25979	0.331452	5.0631	0.321246	5.43791	0.342102	5.28946	0.334161	5.39154	0.340624	5.31344	0.332785	5.23043	0.332723	5.40517	0.339681	5.24464	0.330739	5.15395	0.329361	5.29385	0.333709
				5.57723	0.345399					5.30446	0.331942	5.24673	0.329163	5.22709	0.329412	5.22152	0.332914	5.2839	0.335279	5.22351	0.330912	5.27316	0.337325	5.14224	0.328355	5.24914	0.329957	5.26866	0.33083	5.07199	0.320632	5.44682	0.341449	5.29852	0.33352	5.40044	0.339985	5.32208	0.332156	5.23907	0.332099	5.41491	0.339038	5.25314	0.330118	5.16256	0.328737	5.3025	0.333082
				5.61674	0.346668					5.31696	0.331486	5.25861	0.328733	5.23884	0.328982	5.23327	0.332479	5.29603	0.334835	5.23508	0.330481	5.28519	0.336884	5.15428	0.32792	5.26196	0.329524	5.28072	0.330399	5.08408	0.320206	5.45894	0.340996	5.31084	0.333075	5.41255	0.339541	5.33384	0.33172	5.25082	0.331666	5.42816	0.338592	5.26471	0.329688	5.17426	0.328304	5.31428	0.332647
				5.65648	0.347939					5.33244	0.331244	5.27332	0.328505	5.25339	0.328754	5.24781	0.332249	5.31105	0.3346	5.24939	0.330252	5.30008	0.336649	5.16918	0.327689	5.27782	0.329293	5.29565	0.33017	5.09905	0.319979	5.47393	0.340755	5.32608	0.332839	5.42754	0.339306	5.34839	0.331489	5.26535	0.331436	5.44456	0.338355	5.27901	0.32946	5.18875	0.328074	5.32884	0.332416
				5.69646	0.349211					5.35046	0.331222	5.29045	0.328485	5.27032	0.328734	5.26474	0.332228	5.32853	0.334579	5.26606	0.330231	5.31741	0.336628	5.18653	0.327668	5.2963	0.329272	5.31303	0.33015	5.11648	0.319959	5.4914	0.340734	5.34383	0.332818	5.44499	0.339285	5.36533	0.331468	5.28228	0.331415	5.46365	0.338334	5.29567	0.329439	5.20562	0.328054	5.34581	0.332395
				5.73668	0.350485					5.37054	0.331421	5.30954	0.328672	5.28919	0.328921	5.2836	0.332418	5.34801	0.334772	5.28462	0.33042	5.33672	0.336821	5.20587	0.327858	5.31689	0.329461	5.33239	0.330338	5.13589	0.320145	5.51085	0.340932	5.36361	0.333012	5.46444	0.339479	5.3842	0.331659	5.30114	0.331605	5.48493	0.338528	5.31423	0.329627	5.22442	0.328243	5.36471	0.332585
				5.77715	0.351759					5.39212	0.331837	5.33006	0.329063	5.30947	0.329312	5.30388	0.332814	5.36896	0.335176	5.30458	0.330813	5.35747	0.337222	5.22665	0.328254	5.33902	0.329855	5.35321	0.33073	5.15677	0.320532	5.53176	0.341344	5.38487	0.333416	5.48534	0.339882	5.40449	0.332056	5.32142	0.331999	5.5078	0.338933	5.33419	0.330019	5.24462	0.328637	5.38502	0.332981
				5.81785	0.353035					5.41463	0.332456	5.35145	0.329646	5.33062	0.329896	5.32502	0.333404	5.39079	0.335779	5.32539	0.331399	5.37912	0.337821	5.24832	0.328844	5.3621	0.330444	5.37492	0.331315	5.17853	0.321111	5.55356	0.34196	5.40704	0.33402	5.50713	0.340484	5.42564	0.332648	5.34255	0.332587	5.53165	0.339538	5.35499	0.330603	5.26569	0.329225	5.4062	0.333572
				5.8588	0.354311					5.43744	0.333263	5.37313	0.330405	5.35205	0.330656	5.34645	0.334173	5.41292	0.336564	5.34648	0.332162	5.40105	0.338601	5.27028	0.329614	5.38549	0.33121	5.39692	0.332077	5.20059	0.321864	5.57566	0.342761	5.42951	0.334806	5.52922	0.341268	5.44708	0.333419	5.36398	0.333353	5.55582	0.340326	5.37607	0.331364	5.28704	0.32999	5.42767	0.334342
				5.9	0.35559					5.45993	0.334236	5.39451	0.331321	5.37318	0.331572	5.36758	0.3351	5.43475	0.33751	5.36728	0.333082	5.42268	0.339541	5.29194	0.330541	5.40855	0.332133	5.41861	0.332996	5.22234	0.322773	5.59745	0.343727	5.45166	0.335754	5.551	0.342213	5.46822	0.334348	5.38511	0.334276	5.57966	0.341276	5.39687	0.332281	5.30809	0.330913	5.44884	0.33527
				5.9	0.35559					5.48149	0.335347	5.415	0.332367	5.39344	0.332618	5.38784	0.336159	5.45567	0.338591	5.38721	0.334133	5.44341	0.340615	5.3127	0.3316	5.43066	0.333189	5.43941	0.334046	5.24319	0.32381	5.61833	0.34483	5.4729	0.336837	5.57187	0.343293	5.48848	0.335411	5.40536	0.335331	5.60251	0.342361	5.4168	0.33333	5.32828	0.331968	5.46913	0.33633
				IsoLine	IsoLine					5.50153	0.336568	5.43405	0.333515	5.41228	0.333768	5.40666	0.337321	5.47511	0.339777	5.40574	0.335288	5.46269	0.341795	5.332	0.332763	5.45122	0.334348	5.45874	0.335199	5.26257	0.32495	5.63775	0.346042	5.49264	0.338025	5.59128	0.344479	5.50732	0.336577	5.42418	0.336489	5.62375	0.343553	5.43532	0.33448	5.34704	0.333126	5.488	0.337494
										5.5195	0.337863	5.45114	0.334734	5.42917	0.334988	5.42355	0.338556	5.49256	0.341037	5.42236	0.336513	5.47998	0.343047	5.34931	0.333998	5.46965	0.335578	5.47608	0.336423	5.27996	0.32616	5.65516	0.347328	5.51035	0.339288	5.60869	0.345737	5.52422	0.337815	5.44107	0.337719	5.64281	0.344819	5.45194	0.335702	5.36386	0.334355	5.50492	0.338729
										5.53492	0.339199	5.4658	0.335991	5.44366	0.336245	5.43804	0.339828	5.50752	0.342336	5.43662	0.337776	5.4948	0.344338	5.36416	0.335271	5.48547	0.336847	5.49095	0.337684	5.29487	0.327407	5.6701	0.348655	5.52554	0.340589	5.62362	0.347035	5.53871	0.339091	5.45555	0.338987	5.65915	0.346123	5.46619	0.336961	5.3783	0.335622	5.51943	0.340003
										5.54737	0.340538	5.47763	0.337251	5.45535	0.337506	5.44973	0.341104	5.51959	0.343638	5.44813	0.339043	5.50677	0.345632	5.37614	0.336548	5.49824	0.338119	5.50296	0.338949	5.30691	0.328658	5.68215	0.349984	5.5378	0.341893	5.63567	0.348336	5.5504	0.340371	5.46724	0.340258	5.67235	0.347431	5.47769	0.338224	5.38994	0.336893	5.53114	0.34128
										5.55649	0.341844	5.4863	0.33848	5.46393	0.338737	5.4583	0.342349	5.52845	0.344909	5.45656	0.340278	5.51555	0.346894	5.38493	0.337793	5.5076	0.339359	5.51176	0.340183	5.31574	0.329877	5.69099	0.351281	5.54679	0.343166	5.64451	0.349605	5.55898	0.341619	5.47581	0.341498	5.68203	0.348707	5.48613	0.339455	5.39849	0.338132	5.53973	0.342526
										5.56206	0.343082	5.49159	0.339645	5.46915	0.339902	5.46353	0.343528	5.53384	0.346112	5.46171	0.341449	5.5209	0.348091	5.39029	0.338973	5.51331	0.340535	5.51713	0.341353	5.32112	0.331033	5.69638	0.35251	5.55227	0.344372	5.6499	0.350808	5.56421	0.342802	5.48104	0.342672	5.68793	0.349916	5.49127	0.340622	5.40369	0.339306	5.54497	0.343707
										5.5639	0.344217	5.49334	0.340713	5.47089	0.340971	5.46526	0.34461	5.53563	0.347217	5.46341	0.342523	5.52267	0.349188	5.39206	0.340055	5.51521	0.341614	5.51891	0.342425	5.32291	0.332094	5.69817	0.353637	5.55409	0.345478	5.65168	0.351911	5.56594	0.343887	5.48277	0.34375	5.68989	0.351025	5.49297	0.341693	5.40542	0.340383	5.5467	0.34479
[truncated: 2 more columns]

## Sheet: PlotDat12
Source sheet	data	2.94698	0.115968	2.8206	0.12	3.12446	0.109433	2.7	0.115143	3.01756	0.115968	3.04286	0.115703	3.04056	0.115163	3.00858	0.11383	2.9874	0.114395	3.02677	0.114526	2.96924	0.113483	3.0504	0.113723	3.03556	0.115656	3.02752	0.11563	3.12389	0.11491	2.93342	0.115707	3.00318	0.115331	2.946	0.115277	3.01546	0.116228	3.01596	0.114487	2.95426	0.116116	3.03405	0.11544	3.04683	0.113973	3.00706	0.115503
Plot name	Concordia12	2.97517	0.115703	2.8206	0.12	3.10458	0.110036	3.25	0.115138	3.01659	0.116133	3.0422	0.115848	3.03964	0.115325	3.00766	0.113989	2.98674	0.11454	3.02585	0.114666	2.9686	0.113631	3.04973	0.113886	3.0349	0.115866	3.02687	0.115787	3.1232	0.11509	2.93252	0.115831	3.00252	0.115484	2.94511	0.115436	3.01454	0.116358	3.01504	0.114645	2.95362	0.116327	3.03313	0.115573	3.0459	0.114134	3.00615	0.115646
Plot Type	1	2.97292	0.115163	2.82966	0.119637	3.08492	0.110643			3.01373	0.116293	3.04024	0.115991	3.03689	0.115482	3.00495	0.114145	2.98479	0.114682	3.02312	0.114802	2.96668	0.113775	3.04773	0.114046	3.03293	0.116071	3.02492	0.115941	3.12115	0.115265	2.92983	0.115953	3.00054	0.115634	2.94245	0.115591	3.0118	0.116484	3.01232	0.114798	2.9517	0.116535	3.03039	0.115703	3.04313	0.11429	3.00343	0.115785
1st free col	53	2.94158	0.11383	2.83878	0.119276	3.06548	0.111254			3.00905	0.116444	3.03701	0.116128	3.03241	0.115631	3.0005	0.114291	2.98157	0.114819	3.01866	0.114931	2.96352	0.113914	3.04445	0.114199	3.02969	0.116269	3.02171	0.116089	3.11777	0.115434	2.92543	0.116067	2.99729	0.115778	2.93811	0.115737	3.00732	0.116604	3.00787	0.114943	2.94854	0.116734	3.02592	0.115826	3.03859	0.114437	2.99899	0.115916
Sigma Level	1	2.92001	0.114395	2.84794	0.118916	3.04626	0.111869			3.00267	0.116582	3.03258	0.116257	3.0263	0.115767	2.99445	0.114425	2.97716	0.114947	3.01258	0.115049	2.95919	0.114045	3.03994	0.114344	3.02523	0.116455	3.0173	0.116228	3.11314	0.115593	2.91944	0.116172	2.99282	0.115913	2.93219	0.11587	3.00123	0.116713	3.00181	0.115075	2.9442	0.116922	3.01983	0.115938	3.03241	0.114571	2.99293	0.116036
Absolute Errs	FALSE	2.95945	0.114526	2.85716	0.118557	3.02724	0.112488			2.99478	0.116704	3.02702	0.116375	3.01873	0.115886	2.98695	0.114543	2.97163	0.115065	3.00505	0.115153	2.95376	0.114165	3.03429	0.114476	3.01966	0.116625	3.01178	0.116355	3.10734	0.115738	2.91202	0.116265	2.98723	0.116036	2.92486	0.115987	2.99368	0.116809	2.99431	0.115192	2.93877	0.117093	3.01228	0.116037	3.02476	0.11469	2.98544	0.116142
Symbol Type	1	2.90305	0.113483	2.86643	0.118199	3.00843	0.113112			2.98558	0.116805	3.02046	0.11648	3.00992	0.115986	2.97822	0.114641	2.9651	0.115169	2.99627	0.115239	2.94734	0.114271	3.02762	0.114593	3.01307	0.116776	3.00526	0.116469	3.10048	0.115867	2.90337	0.116341	2.98062	0.116147	2.91632	0.116085	2.98488	0.116889	2.98557	0.115289	2.93236	0.117246	3.0035	0.116119	3.01584	0.114788	2.97671	0.11623
Inverse Plot	TRUE	2.98154	0.113723	2.87575	0.117843	2.98983	0.113739			2.97533	0.116884	3.01302	0.11657	3.00009	0.116063	2.96849	0.114718	2.95769	0.115259	2.98649	0.115306	2.94007	0.114362	3.02005	0.114694	3.0056	0.116906	2.99787	0.116566	3.0927	0.115978	2.89374	0.116401	2.97312	0.116241	2.90681	0.116161	2.97508	0.116951	2.97583	0.115364	2.92508	0.117376	2.9937	0.116183	3.00591	0.114865	2.96698	0.116298
Color Plot	TRUE	2.96759	0.115656	2.88513	0.117488	2.97142	0.114371			2.9643	0.116937	3.00485	0.116643	2.98953	0.116115	2.95803	0.11477	2.94955	0.115331	2.97598	0.115352	2.93207	0.114436	3.01173	0.114775	2.99739	0.117011	2.98974	0.116644	3.08416	0.116068	2.88338	0.116442	2.96488	0.116317	2.89657	0.116213	2.96454	0.116993	2.96535	0.115415	2.91708	0.117482	2.98317	0.116226	2.99523	0.114917	2.95651	0.116345
3D plot	FALSE	2.96025	0.11563	2.89456	0.117135	2.95321	0.115007			2.95281	0.116965	2.99609	0.116698	2.97851	0.116142	2.94711	0.114796	2.94084	0.115386	2.96501	0.115375	2.92351	0.114492	3.00282	0.114836	2.98859	0.11709	2.98104	0.116703	3.07501	0.116135	2.87258	0.116462	2.95606	0.116375	2.8859	0.116239	2.95354	0.117014	2.95442	0.115441	2.90851	0.117562	2.97218	0.116248	2.98408	0.114944	2.9456	0.116369
Linear	FALSE	3.05315	0.11491	2.90404	0.116782	2.9352	0.115648			2.94115	0.116965	2.98693	0.116733	2.96734	0.116142	2.93605	0.114796	2.93171	0.115421	2.95389	0.115375	2.91455	0.114527	2.9935	0.114876	2.97939	0.11714	2.97193	0.116741	3.06543	0.116178	2.86162	0.116462	2.94683	0.116412	2.87508	0.116239	2.94239	0.117014	2.94334	0.115441	2.89955	0.117613	2.96104	0.116248	2.97279	0.114944	2.93453	0.116369
Data Range	L10:O30	2.8671	0.115707	2.91358	0.116431	2.91738	0.116293			2.92965	0.116937	2.97754	0.116748	2.95632	0.116115	2.92513	0.11477	2.92237	0.115436	2.94293	0.115352	2.90536	0.114543	2.98394	0.114893	2.96996	0.117162	2.9626	0.116758	3.05562	0.116197	2.85082	0.116442	2.93736	0.116428	2.86441	0.116213	2.9314	0.116993	2.93242	0.115415	2.89037	0.117635	2.95006	0.116226	2.96164	0.114917	2.92362	0.116345
Filled Symbols	FALSE	2.93498	0.115331	2.92317	0.116082	2.89974	0.116942			2.91863	0.116884	2.9681	0.116743	2.94575	0.116063	2.91467	0.114718	2.91297	0.115431	2.93241	0.115306	2.89613	0.114538	2.97434	0.114887	2.96049	0.117155	2.95322	0.116752	3.04575	0.116191	2.84046	0.116401	2.92785	0.116422	2.85418	0.116161	2.92086	0.116951	2.92194	0.115364	2.88113	0.117628	2.93952	0.116183	2.95096	0.114865	2.91315	0.116298
ConcAge	FALSE	2.88049	0.115277	2.93282	0.115733	2.88229	0.117595			2.90838	0.116805	2.9588	0.116718	2.93593	0.115986	2.90493	0.114641	2.90371	0.115406	2.92263	0.115239	2.88704	0.114512	2.96488	0.114859	2.95115	0.117119	2.94398	0.116725	3.03603	0.11616	2.83082	0.116341	2.91848	0.116396	2.84466	0.116085	2.91105	0.116889	2.9122	0.115289	2.87204	0.117591	2.92973	0.116119	2.94102	0.114788	2.90342	0.11623
ConcSwap	FALSE	2.94797	0.116228	2.94252	0.115386	2.86502	0.118253			2.89918	0.116704	2.94982	0.116673	2.92711	0.115886	2.8962	0.114543	2.89477	0.115361	2.91386	0.115153	2.87826	0.114466	2.95574	0.114809	2.94213	0.117054	2.93505	0.116676	3.02665	0.116104	2.82218	0.116265	2.90943	0.116348	2.83612	0.115987	2.90226	0.116809	2.90346	0.115192	2.86325	0.117526	2.92094	0.116037	2.93211	0.11469	2.89469	0.116142
1st Symbol-row	1	2.94888	0.114487	2.95228	0.11504	2.84793	0.118916			2.89128	0.116582	2.94133	0.116609	2.91955	0.115767	2.88871	0.114425	2.88632	0.115297	2.90633	0.115049	2.86996	0.114401	2.94711	0.114737	2.9336	0.116961	2.92661	0.116607	3.01778	0.116025	2.81476	0.116172	2.90088	0.116281	2.82879	0.11587	2.89471	0.116713	2.89595	0.115075	2.85495	0.117433	2.9134	0.115938	2.92446	0.114571	2.8872	0.116036
		2.88805	0.116116	2.9621	0.114696	2.83102	0.119583			2.88491	0.116444	2.9335	0.116527	2.91344	0.115631	2.88266	0.114291	2.87853	0.115216	2.90025	0.114931	2.8623	0.114319	2.93914	0.114646	2.92574	0.116844	2.91883	0.116519	3.00959	0.115925	2.80877	0.116067	2.89299	0.116196	2.82288	0.115737	2.88861	0.116604	2.88989	0.114943	2.84729	0.117314	2.9073	0.115826	2.91828	0.114437	2.88114	0.115916
		2.96661	0.11544	2.97197	0.114352	IsoLine	IsoLine			2.88023	0.116293	2.92648	0.116429	2.90895	0.115482	2.87821	0.114145	2.87154	0.115119	2.89578	0.114802	2.85544	0.11422	2.932	0.114536	2.91869	0.116703	2.91186	0.116414	3.00226	0.115805	2.80437	0.115953	2.88592	0.116093	2.81853	0.115591	2.88413	0.116484	2.88544	0.114798	2.84043	0.117172	2.90283	0.115703	2.91374	0.11429	2.8767	0.115785
		2.97843	0.113973	2.9819	0.11401					2.87737	0.116133	2.92041	0.116318	2.90621	0.115325	2.87549	0.113989	2.8655	0.115007	2.89305	0.114666	2.8495	0.114106	2.92583	0.114411	2.9126	0.116542	2.90583	0.116293	2.99592	0.115667	2.80168	0.115831	2.87981	0.115976	2.81587	0.115436	2.8814	0.116358	2.88272	0.114645	2.83449	0.11701	2.9001	0.115573	2.91097	0.114134	2.87398	0.115646
		2.94006	0.115503	2.99189	0.113669					2.8764	0.115968	2.91541	0.116194	2.90529	0.115163	2.87458	0.11383	2.86052	0.114884	2.89214	0.114526	2.84461	0.113981	2.92074	0.114273	2.90757	0.116364	2.90085	0.11616	2.99069	0.115515	2.80077	0.115707	2.87477	0.115846	2.81498	0.115277	2.88048	0.116228	2.88181	0.114487	2.8296	0.11683	2.89918	0.11544	2.91004	0.113973	2.87307	0.115503
		2.93545	0.11582	3.00194	0.113329					2.87737	0.115804	2.91157	0.116061	2.90621	0.115002	2.87549	0.11367	2.85669	0.114752	2.89305	0.114385	2.84085	0.113846	2.91683	0.114124	2.90372	0.116171	2.89704	0.116016	2.98667	0.115351	2.80168	0.115582	2.8709	0.115707	2.81587	0.115118	2.8814	0.116098	2.88272	0.11433	2.82584	0.116636	2.9001	0.115306	2.91097	0.113813	2.87398	0.11536
		IsoLine	IsoLine	3.01205	0.112991					2.88023	0.115644	2.90896	0.11592	2.90895	0.114845	2.87821	0.113515	2.8541	0.114612	2.89578	0.114249	2.83831	0.113704	2.91418	0.113967	2.9011	0.115969	2.89445	0.115864	2.98395	0.115178	2.80437	0.11546	2.86827	0.115559	2.81853	0.114964	2.88413	0.115972	2.88544	0.114176	2.8233	0.116432	2.90283	0.115176	2.91374	0.113657	2.8767	0.11522
				3.02221	0.112654					2.88491	0.115493	2.90765	0.115776	2.91344	0.114696	2.88266	0.113368	2.85279	0.114468	2.90025	0.11412	2.83702	0.113557	2.91285	0.113805	2.89978	0.115761	2.89314	0.115709	2.98258	0.115	2.80877	0.115346	2.86695	0.115408	2.82288	0.114818	2.88861	0.115853	2.88989	0.114032	2.82201	0.116222	2.9073	0.115053	2.91828	0.11351	2.88114	0.115089
				3.03244	0.112318					2.89128	0.115355	2.90765	0.11563	2.91955	0.11456	2.88871	0.113234	2.85279	0.114323	2.90633	0.114002	2.83702	0.113409	2.91285	0.113642	2.89978	0.115551	2.89314	0.115551	2.98258	0.114821	2.81476	0.115241	2.86695	0.115255	2.82879	0.114684	2.89471	0.115744	2.89595	0.113899	2.82201	0.11601	2.9134	0.114941	2.92446	0.113375	2.8872	0.114969
				3.04273	0.111983					2.89918	0.115233	2.90896	0.115485	2.92711	0.114441	2.8962	0.113116	2.8541	0.114179	2.91386	0.113899	2.83831	0.113263	2.91418	0.11348	2.9011	0.115342	2.89445	0.115395	2.98395	0.114643	2.82218	0.115148	2.86827	0.115103	2.83612	0.114567	2.90226	0.115648	2.90346	0.113783	2.8233	0.115799	2.92094	0.114842	2.93211	0.113257	2.89469	0.114863
				3.05308	0.11165					2.90838	0.115132	2.91157	0.115345	2.93593	0.114341	2.90493	0.113018	2.85669	0.114039	2.92263	0.113812	2.84085	0.11312	2.91683	0.113323	2.90372	0.11514	2.89704	0.115244	2.98667	0.11447	2.83082	0.115072	2.8709	0.114956	2.84466	0.114469	2.91105	0.115568	2.9122	0.113686	2.82584	0.115595	2.92973	0.11476	2.94102	0.113158	2.90342	0.114775
				3.06349	0.111317					2.91863	0.115053	2.91541	0.115212	2.94575	0.114264	2.91467	0.112942	2.86052	0.113907	2.93241	0.113745	2.84461	0.112985	2.92074	0.113174	2.90757	0.114948	2.90085	0.1151	2.99069	0.114306	2.84046	0.115012	2.87477	0.114816	2.85418	0.114393	2.92086	0.115506	2.92194	0.113611	2.8296	0.115402	2.93952	0.114696	2.95096	0.113082	2.91315	0.114707
				3.07396	0.110986					2.92965	0.115	2.92041	0.115088	2.95632	0.114211	2.92513	0.11289	2.8655	0.113784	2.94293	0.1137	2.8495	0.11286	2.92583	0.113035	2.9126	0.11477	2.90583	0.114966	2.99592	0.114154	2.85082	0.114971	2.87981	0.114687	2.86441	0.114341	2.9314	0.115464	2.93242	0.113559	2.83449	0.115222	2.95006	0.114653	2.96164	0.11303	2.92362	0.11466
				3.0845	0.110656					2.94115	0.114972	2.92648	0.114976	2.96734	0.114185	2.93605	0.112863	2.87154	0.113672	2.95389	0.113676	2.85544	0.112747	2.932	0.11291	2.91869	0.114608	2.91186	0.114846	3.00226	0.114016	2.86162	0.114951	2.88592	0.114569	2.87508	0.114315	2.94239	0.115442	2.94334	0.113533	2.84043	0.115059	2.96104	0.114631	2.97279	0.113003	2.93453	0.114637
				3.0951	0.110328					2.95281	0.114972	2.9335	0.114878	2.97851	0.114185	2.94711	0.112863	2.87853	0.113575	2.96501	0.113676	2.8623	0.112648	2.93914	0.112801	2.92574	0.114468	2.91883	0.11474	3.00959	0.113896	2.87258	0.114951	2.89299	0.114467	2.8859	0.114315	2.95354	0.115442	2.95442	0.113533	2.84729	0.114917	2.97218	0.114631	2.98408	0.113003	2.9456	0.114637
				3.10576	0.11					2.9643	0.115	2.94133	0.114797	2.98953	0.114211	2.95803	0.11289	2.88632	0.113494	2.97598	0.1137	2.86996	0.112565	2.94711	0.11271	2.9336	0.11435	2.92661	0.114652	3.01778	0.113795	2.88338	0.114971	2.90088	0.114381	2.89657	0.114341	2.96454	0.115464	2.96535	0.113559	2.85495	0.114799	2.98317	0.114653	2.99523	0.11303	2.95651	0.11466
				3.10576	0.11					2.97533	0.115053	2.94982	0.114733	3.00009	0.114264	2.96849	0.112942	2.89477	0.11343	2.98649	0.113745	2.87826	0.1125	2.95574	0.112638	2.94213	0.114258	2.93505	0.114583	3.02665	0.113717	2.89374	0.115012	2.90943	0.114314	2.90681	0.114393	2.97508	0.115506	2.97583	0.113611	2.86325	0.114706	2.9937	0.114696	3.00591	0.113082	2.96698	0.114707
				IsoLine	IsoLine					2.98558	0.115132	2.9588	0.114688	3.00992	0.114341	2.97822	0.113018	2.90371	0.113385	2.99627	0.113812	2.88704	0.112454	2.96488	0.112588	2.95115	0.114193	2.94398	0.114535	3.03603	0.113661	2.90337	0.115072	2.91848	0.114267	2.91632	0.114469	2.98488	0.115568	2.98557	0.113686	2.87204	0.11464	3.0035	0.11476	3.01584	0.113158	2.97671	0.114775
										2.99478	0.115233	2.9681	0.114662	3.01873	0.114441	2.98695	0.113116	2.91297	0.11336	3.00505	0.113899	2.89613	0.112429	2.97434	0.112559	2.96049	0.114156	2.95322	0.114507	3.04575	0.11363	2.91202	0.115148	2.92785	0.114241	2.92486	0.114567	2.99368	0.115648	2.99431	0.113783	2.88113	0.114603	3.01228	0.114842	3.02476	0.113257	2.98544	0.114863
										3.00267	0.115355	2.97754	0.114657	3.0263	0.11456	2.99445	0.113234	2.92237	0.113355	3.01258	0.114002	2.90536	0.112423	2.98394	0.112554	2.96996	0.114149	2.9626	0.114502	3.05562	0.113624	2.91944	0.115241	2.93736	0.114235	2.93219	0.114684	3.00123	0.115744	3.00181	0.113899	2.89037	0.114596	3.01983	0.114941	3.03241	0.113375	2.99293	0.114969
										3.00905	0.115493	2.98693	0.114673	3.03241	0.114696	3.0005	0.113368	2.93171	0.11337	3.01866	0.11412	2.91455	0.112439	2.9935	0.112571	2.97939	0.114171	2.97193	0.114518	3.06543	0.113643	2.92543	0.115346	2.94683	0.114251	2.93811	0.114818	3.00732	0.115853	3.00787	0.114032	2.89955	0.114618	3.02592	0.115053	3.03859	0.11351	2.99899	0.115089
										3.01373	0.115644	2.99609	0.114708	3.03689	0.114845	3.00495	0.113515	2.94084	0.113405	3.02312	0.114249	2.92351	0.112475	3.00282	0.11261	2.98859	0.114222	2.98104	0.114556	3.07501	0.113686	2.92983	0.11546	2.95606	0.114288	2.94245	0.114964	3.0118	0.115972	3.01232	0.114176	2.90851	0.114669	3.03039	0.115176	3.04313	0.113657	3.00343	0.11522
										3.01659	0.115804	3.00485	0.114763	3.03964	0.115002	3.00766	0.11367	2.94955	0.11346	3.02585	0.114385	2.93207	0.11253	3.01173	0.112671	2.99739	0.114301	2.98974	0.114615	3.08416	0.113753	2.93252	0.115582	2.96488	0.114346	2.94511	0.115118	3.01454	0.116098	3.01504	0.11433	2.91708	0.114749	3.03313	0.115306	3.0459	0.113813	3.00615	0.11536
										3.01756	0.115968	3.01302	0.114836	3.04056	0.115163	3.00858	0.11383	2.95769	0.113532	3.02677	0.114526	2.94007	0.112604	3.02005	0.112753	3.0056	0.114406	2.99787	0.114694	3.0927	0.113843	2.93342	0.115707	2.97312	0.114422	2.946	0.115277	3.01546	0.116228	3.01596	0.114487	2.92508	0.114855	3.03405	0.11544	3.04683	0.113973	3.00706	0.115503
												3.02046	0.114925					2.9651	0.113622			2.94734	0.112695	3.02762	0.112853	3.01307	0.114535	3.00526	0.114791	3.10048	0.113954			2.98062	0.114516							2.93236	0.114985
												3.02702	0.11503					2.97163	0.113726			2.95376	0.112802	3.03429	0.112971	3.01966	0.114687	3.01178	0.114904	3.10734	0.114083			2.98723	0.114626							2.93877	0.115138
												3.03258	0.115148					2.97716	0.113844			2.95919	0.112921	3.03994	0.113103	3.02523	0.114857	3.0173	0.115032	3.11314	0.114228			2.99282	0.11475							2.9442	0.11531
												3.03701	0.115277					2.98157	0.113972			2.96352	0.113052	3.04445	0.113247	3.02969	0.115043	3.02171	0.115171	3.11777	0.114387			2.99729	0.114885							2.94854	0.115497
												3.04024	0.115414					2.98479	0.114109			2.96668	0.113191	3.04773	0.113401	3.03293	0.11524	3.02492	0.115319	3.12115	0.114556			3.00054	0.115029							2.9517	0.115696
												3.0422	0.115557					2.98674	0.114251			2.9686	0.113336	3.04973	0.11356	3.0349	0.115446	3.02687	0.115473	3.1232	0.114731			3.00252	0.115179							2.95362	0.115904
												3.04286	0.115703					2.9874	0.114395			2.96924	0.113483	3.0504	0.113723	3.03556	0.115656	3.02752	0.11563	3.12389	0.11491			3.00318	0.115331							2.95426	0.116116
[truncated: 4 more columns]

## Sheet: PlotDat15
Source sheet	data	0.2	1882.24	1	1855.93	11.1027	0.85	1844.82
Plot name	Average15	21.8	1882.24	2	1859.75	12.2193	1.15	1844.82
Plot Type	15			3	1861.43	10.1187	1.15	1867.03
1st free col	8			4	1863.71	10.144	0.85	1867.03
Sigma Level	1			5	1870.38	10.7973	0.85	1844.82
Absolute Errs	TRUE			6	1871.83	9.91963	ErrBox	ErrBox
Symbol Type	1			7	1872.43	8.8309	1.85	1847.53
Inverse Plot	FALSE			8	1878.48	13.2675	2.15	1847.53
Color Plot	TRUE			9	1882.44	10.104	2.15	1871.96
3D plot	FALSE			10	1884.22	9.92081	1.85	1871.96
Linear	FALSE			11	1885.07	11.2609	1.85	1847.53
Data Range	X10:Y30			12	1886.75	8.32944	ErrBox	ErrBox
Filled Symbols	TRUE			13	1887.74	8.9114	2.85	1851.32
ConcAge	FALSE			14	1889.72	11.5505	3.15	1851.32
ConcSwap	FALSE			15	1890.12	15.4031	3.15	1871.55
1st Symbol-row	1			16	1890.85	10.6998	2.85	1871.55
				17	1890.91	7.76514	2.85	1851.32
				18	1892.68	7.84698	ErrBox	ErrBox
				19	1894.98	10.1963	3.85	1853.57
				20	1897.26	15.463	4.15	1853.57
				21	1899	8.03014	4.15	1873.86
				IsoLine	IsoLine	IsoLine	3.85	1873.86
							3.85	1853.57
							ErrBox	ErrBox
							4.85	1859.59
							5.15	1859.59
							5.15	1881.18
							4.85	1881.18
							4.85	1859.59
							ErrBox	ErrBox
							5.85	1861.91
							6.15	1861.91
							6.15	1881.75
							5.85	1881.75
							5.85	1861.91
							ErrBox	ErrBox
							6.85	1863.6
							7.15	1863.6
							7.15	1881.26
							6.85	1881.26
							6.85	1863.6
							ErrBox	ErrBox
							7.85	1865.21
							8.15	1865.21
							8.15	1891.75
							7.85	1891.75
							7.85	1865.21
							ErrBox	ErrBox
							8.85	1872.34
							9.15	1872.34
							9.15	1892.55
							8.85	1892.55
							8.85	1872.34
							ErrBox	ErrBox
							9.85	1874.3
							10.15	1874.3
							10.15	1894.14
							9.85	1894.14
							9.85	1874.3
							ErrBox	ErrBox
							10.85	1873.81
							11.15	1873.81
							11.15	1896.33
							10.85	1896.33
							10.85	1873.81
							ErrBox	ErrBox
							11.85	1878.42
							12.15	1878.42
							12.15	1895.08
							11.85	1895.08
							11.85	1878.42
							ErrBox	ErrBox
							12.85	1878.83
							13.15	1878.83
							13.15	1896.65
							12.85	1896.65
							12.85	1878.83
							ErrBox	ErrBox
							13.85	1878.17
							14.15	1878.17
							14.15	1901.27
							13.85	1901.27
							13.85	1878.17
							ErrBox	ErrBox
							14.85	1874.72
							15.15	1874.72
							15.15	1905.53
							14.85	1905.53
							14.85	1874.72
							ErrBox	ErrBox
							15.85	1880.15
							16.15	1880.15
							16.15	1901.55
							15.85	1901.55
							15.85	1880.15
							ErrBox	ErrBox
							16.85	1883.15
							17.15	1883.15
							17.15	1898.68
							16.85	1898.68
							16.85	1883.15
							ErrBox	ErrBox
							17.85	1884.83
							18.15	1884.83
							18.15	1900.52
							17.85	1900.52
							17.85	1884.83
							ErrBox	ErrBox
							18.85	1884.78
							19.15	1884.78
							19.15	1905.18
							18.85	1905.18
							18.85	1884.78
							ErrBox	ErrBox
							19.85	1881.8
							20.15	1881.8
							20.15	1912.72
							19.85	1912.72
							19.85	1881.8
							ErrBox	ErrBox
							20.85	1890.97
							21.15	1890.97
							21.15	1907.03
							20.85	1907.03
							20.85	1890.97
							ErrBox	ErrBox

## Sheet: PlotDat20
Source sheet	data	2.99809	0.113488	1.88619	0.19	3.54967	0.0987156	1.77259	0.19	3.0663	0.113488	2.25843	0.158781	2.34715	0.158887	2.29721	0.160477	2.29259	0.161648	2.18193	0.1666	2.1548	0.16806	2.19967	0.168556	2.16713	0.168854	2.14647	0.169397	2.10117	0.169703	2.11747	0.170752	2.12562	0.170754	2.11863	0.171052	2.12858	0.171726	2.14777	0.171899	2.09	0.17245	2.99763	0.107226
Plot name	Concordia20	2.20645	0.158781	1.88619	0.19	3.31396	0.104187	3.20646	0.1	3.06354	0.113578	2.25632	0.159157	2.34503	0.159126	2.29514	0.160795	2.29052	0.161888	2.17997	0.166851	2.1527	0.168259	2.19764	0.168928	2.16514	0.169093	2.14452	0.169737	2.09915	0.170126	2.11548	0.171022	2.12369	0.17112	2.11671	0.171471	2.12666	0.17203	2.14584	0.172109	2.08898	0.172845	2.63006	0.120602
Plot Type	1	2.29488	0.158887	1.91809	0.185753	3.10458	0.110036			3.05547	0.113661	2.25018	0.159502	2.33885	0.159345	2.28908	0.161087	2.28445	0.162109	2.17422	0.167082	2.14654	0.168442	2.19172	0.16927	2.15933	0.169313	2.13882	0.170049	2.09324	0.170514	2.10967	0.171271	2.11803	0.171457	2.11112	0.171856	2.12104	0.17231	2.14019	0.172302	2.08598	0.173223	2.32824	0.135999
1st free col	45	2.24601	0.160477	1.95088	0.181615	2.91738	0.116293			3.04276	0.11373	2.24049	0.159789	2.32911	0.159528	2.27954	0.16133	2.2749	0.162293	2.16517	0.167275	2.13685	0.168595	2.18238	0.169554	2.15018	0.169495	2.12983	0.170309	2.08393	0.170837	2.1005	0.171477	2.10912	0.171737	2.10229	0.172177	2.1122	0.172542	2.1313	0.172462	2.08112	0.173567	2.07726	0.153646
Sigma Level	1	2.24132	0.161648	1.98462	0.177583	2.74902	0.122987			3.02643	0.113779	2.22804	0.159995	2.31659	0.159658	2.26728	0.161504	2.26262	0.162424	2.15354	0.167412	2.12439	0.168704	2.17039	0.169757	2.13843	0.169626	2.11829	0.170495	2.07198	0.171068	2.08872	0.171624	2.09767	0.171937	2.09096	0.172406	2.10083	0.172708	2.11987	0.172577	2.07461	0.173863	1.86641	0.173805
Absolute Errs	FALSE	2.13336	0.1666	2.01934	0.173655	2.59682	0.130151			3.0078	0.113805	2.21385	0.160102	2.30231	0.159726	2.2533	0.161594	2.24862	0.162492	2.14027	0.167484	2.11018	0.16876	2.15671	0.169863	2.12502	0.169694	2.10512	0.170592	2.05834	0.171188	2.07529	0.171701	2.08461	0.172042	2.07803	0.172525	2.08787	0.172795	2.10683	0.172636	2.06674	0.174096
Symbol Type	1	2.10278	0.16806	2.05509	0.169827	2.45857	0.137821			2.98839	0.113805	2.19906	0.160102	2.28744	0.159726	2.23873	0.161594	2.23402	0.162492	2.12644	0.167484	2.09538	0.16876	2.14245	0.169863	2.11105	0.169694	2.09139	0.170592	2.04412	0.171188	2.06129	0.171701	2.071	0.172042	2.06455	0.172525	2.07436	0.172795	2.09325	0.172636	2.05786	0.174258
Inverse Plot	TRUE	2.14958	0.168556	2.0919	0.166097	2.33246	0.146034			2.96976	0.113779	2.18486	0.159995	2.27316	0.159658	2.22474	0.161504	2.22002	0.162424	2.11318	0.167412	2.08117	0.168704	2.12877	0.169757	2.09764	0.169626	2.07822	0.170495	2.03048	0.171068	2.04786	0.171624	2.05794	0.171937	2.05162	0.172406	2.06139	0.172708	2.08021	0.172577	2.04835	0.17434
Color Plot	TRUE	2.11804	0.168854	2.12984	0.162462	2.21696	0.154833			2.95343	0.11373	2.17242	0.159789	2.26064	0.159528	2.21248	0.16133	2.20774	0.162293	2.10154	0.167275	2.06871	0.168595	2.11678	0.169554	2.08589	0.169495	2.06668	0.170309	2.01853	0.170837	2.03608	0.171477	2.04649	0.171737	2.04029	0.172177	2.05003	0.172542	2.06878	0.172462	2.03863	0.17434
3D plot	FALSE	2.09825	0.169397	2.16895	0.15892	2.1108	0.164261			2.94072	0.113661	2.16273	0.159502	2.2509	0.159345	2.20294	0.161087	2.19818	0.162109	2.09249	0.167082	2.05902	0.168442	2.10744	0.16927	2.07674	0.169313	2.05769	0.170049	2.00922	0.170514	2.02691	0.171271	2.03758	0.171457	2.03146	0.171856	2.04118	0.17231	2.05989	0.172302	2.02912	0.174258
Linear	FALSE	2.05123	0.169703	2.20928	0.155468	2.01291	0.174366			2.93265	0.113578	2.15659	0.159157	2.24472	0.159126	2.19689	0.160795	2.19212	0.161888	2.08674	0.166851	2.05287	0.168259	2.10152	0.168928	2.07094	0.169093	2.05199	0.169737	2.00331	0.170126	2.0211	0.171022	2.03192	0.17112	2.02587	0.171471	2.03557	0.17203	2.05424	0.172109	2.02024	0.174096
Data Range	L32:O51	2.06829	0.170752	2.2509	0.152104	1.92236	0.1852			2.92989	0.113488	2.15448	0.158781	2.2426	0.158887	2.19481	0.160477	2.19004	0.161648	2.08478	0.1666	2.05076	0.16806	2.09949	0.168556	2.06895	0.168854	2.05003	0.169397	2.00129	0.169703	2.0191	0.170752	2.02999	0.170754	2.02395	0.171052	2.03364	0.171726	2.05231	0.171899	2.01237	0.173863
Filled Symbols	FALSE	2.07781	0.170754	2.29385	0.148825	IsoLine	IsoLine			2.93265	0.113398	2.15659	0.158405	2.24472	0.158648	2.19689	0.160159	2.19212	0.161408	2.08674	0.166348	2.05287	0.16786	2.10152	0.168185	2.07094	0.168615	2.05199	0.169056	2.00331	0.16928	2.0211	0.170482	2.03192	0.170387	2.02587	0.170633	2.03557	0.171422	2.05424	0.171689	2.00586	0.173567
ConcAge	FALSE	2.07129	0.171052	2.33822	0.14563					2.94072	0.113315	2.16273	0.158059	2.2509	0.158428	2.20294	0.159867	2.19818	0.161187	2.09249	0.166117	2.05902	0.167677	2.10744	0.167843	2.07674	0.168395	2.05769	0.168744	2.00922	0.168891	2.02691	0.170234	2.03758	0.17005	2.03146	0.170247	2.04118	0.171142	2.05989	0.171496	2.001	0.173223
ConcSwap	FALSE	2.08111	0.171726	2.38407	0.142515					2.95343	0.113246	2.17242	0.157772	2.26064	0.158246	2.21248	0.159624	2.20774	0.161004	2.10154	0.165925	2.06871	0.167525	2.11678	0.167559	2.08589	0.168212	2.06668	0.168484	2.01853	0.168568	2.03608	0.170027	2.04649	0.16977	2.04029	0.169927	2.05003	0.17091	2.06878	0.171335	1.998	0.172845
1st Symbol-row	1	2.10004	0.171899	2.43147	0.139478					2.96976	0.113197	2.18486	0.157567	2.27316	0.158116	2.22474	0.15945	2.22002	0.160872	2.11318	0.165787	2.08117	0.167416	2.12877	0.167356	2.09764	0.168082	2.07822	0.168298	2.03048	0.168337	2.04786	0.16988	2.05794	0.16957	2.05162	0.169698	2.06139	0.170744	2.08021	0.171221	1.99698	0.17245
		2.04349	0.17245	2.48051	0.136518					2.98839	0.113171	2.19906	0.15746	2.28744	0.158048	2.23873	0.15936	2.23402	0.160804	2.12644	0.165716	2.09538	0.167359	2.14245	0.16725	2.11105	0.168014	2.09139	0.168201	2.04412	0.168217	2.06129	0.169803	2.071	0.169465	2.06455	0.169579	2.07436	0.170657	2.09325	0.171161	1.998	0.172055
		IsoLine	IsoLine	2.53126	0.133633					3.0078	0.113171	2.21385	0.15746	2.30231	0.158048	2.2533	0.15936	2.24862	0.160804	2.14027	0.165716	2.11018	0.167359	2.15671	0.16725	2.12502	0.168014	2.10512	0.168201	2.05834	0.168217	2.07529	0.169803	2.08461	0.169465	2.07803	0.169579	2.08787	0.170657	2.10683	0.171161	2.001	0.171677
				2.58383	0.13082					3.02643	0.113197	2.22804	0.157567	2.31659	0.158116	2.26728	0.15945	2.26262	0.160872	2.15354	0.165787	2.12439	0.167416	2.17039	0.167356	2.13843	0.168082	2.11829	0.168298	2.07198	0.168337	2.08872	0.16988	2.09767	0.16957	2.09096	0.169698	2.10083	0.170744	2.11987	0.171221	2.00586	0.171333
				2.6383	0.128078					3.04276	0.113246	2.24049	0.157772	2.32911	0.158246	2.27954	0.159624	2.2749	0.161004	2.16517	0.165925	2.13685	0.167525	2.18238	0.167559	2.15018	0.168212	2.12983	0.168484	2.08393	0.168568	2.1005	0.170027	2.10912	0.16977	2.10229	0.169927	2.1122	0.17091	2.1313	0.171335	2.01237	0.171038
				2.69478	0.125405					3.05547	0.113315	2.25018	0.158059	2.33885	0.158428	2.28908	0.159867	2.28445	0.161187	2.17422	0.166117	2.14654	0.167677	2.19172	0.167843	2.15933	0.168395	2.13882	0.168744	2.09324	0.168891	2.10967	0.170234	2.11803	0.17005	2.11112	0.170247	2.12104	0.171142	2.14019	0.171496	2.02024	0.170804
				2.75339	0.122798					3.06354	0.113398	2.25632	0.158405	2.34503	0.158648	2.29514	0.160159	2.29052	0.161408	2.17997	0.166348	2.1527	0.16786	2.19764	0.168185	2.16514	0.168615	2.14452	0.169056	2.09915	0.16928	2.11548	0.170482	2.12369	0.170387	2.11671	0.170633	2.12666	0.171422	2.14584	0.171689	2.02912	0.170643
				2.81424	0.120256					3.0663	0.113488	2.25843	0.158781	2.34715	0.158887	2.29721	0.160477	2.29259	0.161648	2.18193	0.1666	2.1548	0.16806	2.19967	0.168556	2.16713	0.168854	2.14647	0.169397	2.10117	0.169703	2.11747	0.170752	2.12562	0.170754	2.11863	0.171052	2.12858	0.171726	2.14777	0.171899	2.03863	0.17056
				2.87746	0.117778																																					2.04835	0.17056
				2.94321	0.115362																																					2.05786	0.170643
				3.01162	0.113005																																					2.06674	0.170804
				3.08287	0.110707																																					2.07461	0.171038
				3.15713	0.108466																																					2.08112	0.171333
				3.23459	0.10628																																					2.08598	0.171677
				3.31547	0.104148																																					2.08898	0.172055
				3.4	0.102068																																					2.09	0.17245
				3.4	0.102068
				IsoLine	IsoLine

## Sheet: PlotDat26
Source sheet	data	5.21922	0.333545	3.79346	0.28	3.38099	0.261987	3.00529	0.28	5.33886	0.33811	10.1703	0.459629	9.76952	0.441716	10.0865	0.451331	10.1776	0.452298	11.0193	0.475157	11.2963	0.482628	11.0775	0.471718	11.2527	0.478708	11.3992	0.483165	11.7026	0.494641	11.6611	0.490398	11.6056	0.487929	11.6649	0.489419	11.6465	0.487095	11.5473	0.482683	11.9299	0.496048
Plot name	Concordia26	9.92212	0.453216	3.79346	0.28	3.83441	0.281716	14	0.545728	5.33395	0.339633	10.1648	0.461263	9.7646	0.443236	10.0813	0.452884	10.1725	0.45386	11.0138	0.476791	11.2902	0.484429	11.0716	0.473378	11.247	0.480383	11.3933	0.484842	11.6961	0.496458	11.655	0.492158	11.5996	0.489625	11.6588	0.491108	11.6406	0.488773	11.5416	0.484339	11.9235	0.497753
Plot Type	1	9.54619	0.435753	3.98579	0.287956	4.33477	0.301754			5.31974	0.340662	10.1487	0.462545	9.75013	0.444428	10.0661	0.454104	10.1574	0.455086	10.9975	0.478073	11.2723	0.485843	11.0544	0.474681	11.2301	0.481698	11.3759	0.486158	11.677	0.497885	11.637	0.493539	11.5818	0.490956	11.6408	0.492434	11.6232	0.49009	11.5246	0.48564	11.9044	0.499091
1st free col	45	9.8515	0.445234	4.18582	0.295961	4.8869	0.322105			5.29739	0.341115	10.1227	0.46342	9.72675	0.445242	10.0415	0.454936	10.1329	0.455923	10.9711	0.478948	11.2433	0.486807	11.0266	0.475569	11.2028	0.482595	11.3479	0.487056	11.646	0.498858	11.6079	0.494482	11.553	0.491864	11.6116	0.493339	11.595	0.490989	11.4973	0.486527	11.8736	0.500005
Sigma Level	1	9.94417	0.446166	4.39389	0.304016	5.49618	0.342774			5.26871	0.340955	10.088	0.463849	9.69547	0.44564	10.0086	0.455343	10.1002	0.456333	10.9358	0.479377	11.2046	0.487279	10.9894	0.476005	11.1663	0.483035	11.3104	0.487496	11.6047	0.499335	11.5689	0.494944	11.5146	0.492309	11.5726	0.493782	11.5573	0.491429	11.4607	0.486962	11.8324	0.500453
Absolute Errs	FALSE	10.7674	0.468745	4.6103	0.312121	6.16853	0.363766			5.23601	0.340195	10.046	0.463813	9.65767	0.445607	9.96882	0.455309	10.0607	0.456299	10.8932	0.479341	11.1578	0.48724	10.9444	0.475969	11.1222	0.482998	11.2651	0.48746	11.5547	0.499295	11.5219	0.494905	11.4681	0.492272	11.5255	0.493746	11.5118	0.491393	11.4165	0.486926	11.7826	0.500416
Symbol Type	1	11.0197	0.475561	4.8354	0.320276	6.91045	0.385086			5.20196	0.338896	9.99859	0.463314	9.615	0.445143	9.92392	0.454835	10.0161	0.455821	10.8451	0.478842	11.105	0.48669	10.8936	0.475462	11.0724	0.482487	11.2139	0.486948	11.4982	0.498741	11.4687	0.494368	11.4156	0.491755	11.4723	0.49323	11.4603	0.490881	11.3667	0.48642	11.7264	0.499895
Inverse Plot	FALSE	10.8117	0.465207	5.06952	0.328482	7.72917	0.40674			5.1693	0.337163	9.94783	0.462374	9.56932	0.444268	9.87585	0.453941	9.96836	0.454922	10.7935	0.477902	11.0484	0.485654	10.8392	0.474507	11.0191	0.481523	11.1591	0.485983	11.4378	0.497695	11.4118	0.493355	11.3594	0.490779	11.4153	0.492258	11.4053	0.489915	11.3132	0.485467	11.6663	0.498915
Color Plot	TRUE	10.9921	0.472135	5.31304	0.336739	8.63262	0.428732			5.14069	0.335137	9.89596	0.461033	9.52263	0.443022	9.82672	0.452666	9.91955	0.45364	10.7409	0.476562	10.9906	0.484176	10.7837	0.473146	10.9646	0.480149	11.1031	0.484608	11.376	0.496205	11.3537	0.491912	11.302	0.489389	11.3571	0.490873	11.349	0.488539	11.2587	0.484108	11.6047	0.497516
3D plot	FALSE	11.1313	0.476587	5.56633	0.345047	9.62957	0.451068			5.11844	0.332983	9.84523	0.459351	9.47697	0.441457	9.77867	0.451067	9.87182	0.452032	10.6894	0.47488	10.934	0.482322	10.7293	0.471438	10.9113	0.478424	11.0484	0.482882	11.3156	0.494335	11.2968	0.4901	11.2458	0.487643	11.3002	0.489134	11.294	0.486812	11.2053	0.482402	11.5446	0.495762
Linear	FALSE	11.4071	0.487512	5.82979	0.353407	10.7297	0.473753			5.10436	0.330873	9.79785	0.457401	9.43434	0.439644	9.7338	0.449212	9.82725	0.450167	10.6413	0.47293	10.8813	0.480173	10.6786	0.469457	10.8615	0.476425	10.9972	0.480881	11.2592	0.492166	11.2437	0.487999	11.1934	0.48562	11.247	0.487118	11.2426	0.48481	11.1554	0.480425	11.4884	0.493727
Data Range	E32:H51	11.383	0.483491	6.10381	0.361819	11.9437	0.496793			5.09957	0.328981	9.75591	0.455267	9.39659	0.43766	9.69408	0.447184	9.78779	0.448127	10.5987	0.470797	10.8345	0.477822	10.6337	0.467291	10.8175	0.474238	10.952	0.478692	11.2092	0.489794	11.1967	0.485702	11.147	0.483407	11.2	0.484913	11.1971	0.48262	11.1113	0.478262	11.4387	0.491501
Filled Symbols	FALSE	11.3309	0.481277	6.38883	0.370284	13.2834	0.520193			5.10449	0.327458	9.72123	0.453044	9.36539	0.435593	9.66123	0.44507	9.75516	0.446002	10.5635	0.468574	10.7959	0.475372	10.5965	0.465034	10.781	0.47196	10.9145	0.476412	11.1679	0.487323	11.1578	0.483307	11.1086	0.4811	11.161	0.482615	11.1595	0.480337	11.0748	0.476008	11.3975	0.489182
ConcAge	FALSE	11.3864	0.482791	6.68528	0.3788	IsoLine	IsoLine			5.11869	0.326428	9.69533	0.450829	9.34208	0.433533	9.63671	0.442964	9.7308	0.443883	10.5372	0.466359	10.767	0.47293	10.5688	0.462784	10.7538	0.469689	10.8866	0.474139	11.1371	0.484859	11.1288	0.480921	11.0799	0.478801	11.132	0.480325	11.1314	0.478063	11.0475	0.473762	11.3668	0.486871
ConcSwap	FALSE	11.3774	0.480513	6.99363	0.38737					5.14104	0.325975	9.67935	0.448718	9.32769	0.431571	9.62156	0.440957	9.71576	0.441865	10.521	0.464248	10.7492	0.470603	10.5516	0.46064	10.737	0.467525	10.8693	0.471973	11.118	0.482512	11.1109	0.478647	11.0622	0.476611	11.114	0.478143	11.114	0.475895	11.0307	0.471622	11.3479	0.484668
1st Symbol-row	1	11.2862	0.476182	7.31435	0.395993					5.16973	0.326135	9.67397	0.446803	9.32286	0.429791	9.61647	0.439137	9.7107	0.440034	10.5156	0.462334	10.7432	0.468493	10.5459	0.458695	10.7314	0.465562	10.8635	0.470008	11.1116	0.480383	11.1048	0.476585	11.0562	0.474624	11.108	0.476164	11.1082	0.47393	11.025	0.469681	11.3415	0.48267
		11.6357	0.489359	7.64794	0.40467					5.20242	0.326896	9.67944	0.445169	9.32778	0.428271	9.62165	0.437583	9.71585	0.438472	10.5211	0.460699	10.7493	0.466692	10.5517	0.457036	10.7371	0.463887	10.8694	0.468331	11.1181	0.478566	11.111	0.474825	11.0623	0.472929	11.1141	0.474474	11.1141	0.472252	11.0308	0.468024	11.3479	0.480965
		IsoLine	IsoLine	7.99491	0.413401					5.23647	0.328195	9.69551	0.443886	9.34225	0.427079	9.63688	0.436363	9.73097	0.437245	10.5374	0.459417	10.7672	0.465279	10.5689	0.455733	10.754	0.462572	10.8868	0.467015	11.1373	0.47714	11.129	0.473443	11.0801	0.471598	11.1321	0.473148	11.1315	0.470935	11.0477	0.466723	11.367	0.479626
				8.3558	0.422185					5.26913	0.329928	9.72149	0.443011	9.36563	0.426265	9.66148	0.435532	9.75542	0.436409	10.5638	0.458542	10.7961	0.464314	10.5968	0.454844	10.7813	0.461675	10.9148	0.466118	11.1682	0.476167	11.1581	0.472501	11.1088	0.47069	11.1613	0.472243	11.1597	0.470036	11.075	0.465836	11.3978	0.478713
				8.73117	0.431025					5.29774	0.331953	9.75624	0.442582	9.39691	0.425867	9.69439	0.435124	9.78811	0.435999	10.5991	0.458113	10.8349	0.463842	10.634	0.454409	10.8178	0.461235	10.9523	0.465677	11.2096	0.47569	11.197	0.472039	11.1473	0.470244	11.2003	0.4718	11.1974	0.469596	11.1116	0.465401	11.439	0.478265
				9.1216	0.439919					5.31999	0.334108	9.79823	0.442618	9.43471	0.4259	9.73417	0.435158	9.82762	0.436033	10.6417	0.458149	10.8817	0.463881	10.679	0.454445	10.8619	0.461272	10.9976	0.465714	11.2596	0.475729	11.2441	0.472077	11.1938	0.470281	11.2474	0.471837	11.243	0.469633	11.1558	0.465438	11.4888	0.478302
				9.5277	0.448869					5.33408	0.336217	9.84564	0.443117	9.47738	0.426364	9.77907	0.435632	9.87223	0.436511	10.6898	0.458648	10.9345	0.464431	10.7297	0.454951	10.9117	0.461784	11.0488	0.466226	11.316	0.476284	11.2972	0.472615	11.2463	0.470799	11.3006	0.472352	11.2944	0.470145	11.2057	0.465943	11.545	0.478823
				9.95009	0.457874					5.33886	0.33811	9.8964	0.444058	9.52306	0.427239	9.82714	0.436527	9.91998	0.43741	10.7413	0.459588	10.9911	0.465468	10.7841	0.455906	10.965	0.462747	11.1036	0.46719	11.3765	0.477329	11.3541	0.473627	11.3024	0.471774	11.3575	0.473324	11.3494	0.47111	11.2591	0.466897	11.6052	0.479803
				10.3894	0.466935							9.94827	0.445398	9.56975	0.428485	9.87627	0.437801	9.96878	0.438692	10.794	0.460929	11.0489	0.466945	10.8397	0.457268	11.0195	0.464122	11.1596	0.468566	11.4382	0.478819	11.4123	0.475071	11.3599	0.473165	11.4158	0.474709	11.4057	0.472486	11.3137	0.468256	11.6667	0.481201
				10.8464	0.476053							9.99901	0.447081	9.6154	0.43005	9.92432	0.439401	10.0165	0.4403	10.8455	0.462611	11.1054	0.468799	10.894	0.458976	11.0728	0.465846	11.2143	0.470292	11.4986	0.48069	11.4691	0.476883	11.416	0.47491	11.4727	0.476448	11.4608	0.474213	11.3671	0.469961	11.7268	0.482956
				11.3217	0.485227							10.0464	0.449031	9.65804	0.431863	9.96919	0.441255	10.0611	0.442165	10.8936	0.464561	11.1582	0.470948	10.9447	0.460956	11.1226	0.467845	11.2655	0.472293	11.5551	0.482858	11.5223	0.478984	11.4685	0.476934	11.5259	0.478464	11.5121	0.476215	11.4169	0.471938	11.783	0.484991
				11.8161	0.494458							10.0883	0.451164	9.69579	0.433847	10.0089	0.443283	10.1005	0.444205	10.9361	0.466694	11.205	0.4733	10.9897	0.463123	11.1666	0.470032	11.3107	0.474481	11.605	0.48523	11.5693	0.481281	11.5149	0.479147	11.5729	0.480669	11.5576	0.478406	11.4611	0.474101	11.8327	0.487217
				12.3303	0.503747							10.123	0.453387	9.72699	0.435914	10.0418	0.445397	10.1332	0.44633	10.9713	0.468916	11.2436	0.475749	11.0268	0.46538	11.2031	0.472311	11.3482	0.476762	11.6463	0.487702	11.6081	0.483675	11.5533	0.481454	11.6119	0.482967	11.5953	0.480688	11.4976	0.476355	11.8739	0.489536
				12.8651	0.513093							10.1489	0.455603	9.7503	0.437974	10.0663	0.447503	10.1575	0.448449	10.9976	0.471132	11.2725	0.478191	11.0546	0.46763	11.2303	0.474582	11.3761	0.479035	11.6771	0.490165	11.6372	0.486062	11.582	0.483752	11.6409	0.485257	11.6234	0.482962	11.5248	0.478601	11.9046	0.491847
				13.4214	0.522498							10.1649	0.457714	9.76469	0.439936	10.0814	0.44951	10.1726	0.450467	11.0139	0.473242	11.2903	0.480518	11.0717	0.469774	11.2471	0.476746	11.3934	0.481201	11.6962	0.492512	11.6551	0.488335	11.5997	0.485943	11.6589	0.487439	11.6407	0.48513	11.5416	0.480741	11.9236	0.49405
				14	0.531961							10.1703	0.459629	9.76952	0.441716	10.0865	0.451331	10.1776	0.452298	11.0193	0.475157	11.2963	0.482628	11.0775	0.471718	11.2527	0.478708	11.3992	0.483165	11.7026	0.494641	11.6611	0.490398	11.6056	0.487929	11.6649	0.489419	11.6465	0.487095	11.5473	0.482683	11.9299	0.496048
				14	0.531961
				IsoLine	IsoLine

## Sheet: PlotDat35
Source sheet	data	0.2	2558.34	1	2538.41	4.65387	0.85	2533.76
Plot name	Average35	11.8	2558.34	2	2543.36	8.63803	1.15	2533.76
Plot Type	15			3	2546.31	5.54988	1.15	2543.07
1st free col	8			4	2551.69	7.85897	0.85	2543.07
Sigma Level	1			5	2554.71	9.74114	0.85	2533.76
Absolute Errs	TRUE			6	2565.03	6.18652	ErrBox	ErrBox
Symbol Type	1			7	2565.04	8.3905	1.85	2534.72
Inverse Plot	FALSE			8	2567.96	9.57053	2.15	2534.72
Color Plot	TRUE			9	2574.54	6.91756	2.15	2552
3D plot	FALSE			10	2576.22	4.77427	1.85	2552
Linear	FALSE			11	2581.57	12.096	1.85	2534.72
Data Range	X41:Y51			IsoLine	IsoLine	IsoLine	ErrBox	ErrBox
Filled Symbols	TRUE						2.85	2540.76
ConcAge	FALSE						3.15	2540.76
ConcSwap	FALSE						3.15	2551.86
1st Symbol-row	1						2.85	2551.86
							2.85	2540.76
							ErrBox	ErrBox
							3.85	2543.83
							4.15	2543.83
							4.15	2559.55
							3.85	2559.55
							3.85	2543.83
							ErrBox	ErrBox
							4.85	2544.97
							5.15	2544.97
							5.15	2564.45
							4.85	2564.45
							4.85	2544.97
							ErrBox	ErrBox
							5.85	2558.84
							6.15	2558.84
							6.15	2571.22
							5.85	2571.22
							5.85	2558.84
							ErrBox	ErrBox
							6.85	2556.65
							7.15	2556.65
							7.15	2573.43
							6.85	2573.43
							6.85	2556.65
							ErrBox	ErrBox
							7.85	2558.39
							8.15	2558.39
							8.15	2577.53
							7.85	2577.53
							7.85	2558.39
							ErrBox	ErrBox
							8.85	2567.62
							9.15	2567.62
							9.15	2581.45
							8.85	2581.45
							8.85	2567.62
							ErrBox	ErrBox
							9.85	2571.44
							10.15	2571.44
							10.15	2580.99
							9.85	2580.99
							9.85	2571.44
							ErrBox	ErrBox
							10.85	2569.47
							11.15	2569.47
							11.15	2593.66
							10.85	2593.66
							10.85	2569.47
							ErrBox	ErrBox

## Sheet: PlotDat1
Source sheet	data	0.2	1883.73	1	1908.11	24.9052	0.85	1883.21
Plot name	Average1	21.8	1883.73	2	1864.49	24.7303	1.15	1883.21
Plot Type	15			3	1886.45	24.6345	1.15	1933.02
1st free col	8			4	1866.18	24.6082	0.85	1933.02
Sigma Level	1			5	1898.51	25.0984	0.85	1883.21
Absolute Errs	TRUE			6	1882.39	24.5555	ErrBox	ErrBox
Symbol Type	1			7	1876.56	24.4916	1.85	1839.76
Inverse Plot	FALSE			8	1826.4	24.3705	2.15	1839.76
Color Plot	TRUE			9	1869.18	24.4129	2.15	1889.22
3D plot	FALSE			10	1921.04	24.9871	1.85	1889.22
Linear	FALSE			11	1890.12	25.1765	1.85	1839.76
Data Range	AB10:AC30			12	1872.63	24.431	ErrBox	ErrBox
Filled Symbols	TRUE			13	1887.29	24.6564	2.85	1861.81
ConcAge	FALSE			14	1876.12	24.4632	3.15	1861.81
ConcSwap	FALSE			15	1872.09	24.6116	3.15	1911.08
1st Symbol-row	1			16	1867.95	24.399	2.85	1911.08
				17	1928.79	25.5049	2.85	1861.81
				18	1889.86	24.6677	ErrBox	ErrBox
				19	1883.45	25.8699	3.85	1841.57
				20	1916.69	25.1371	4.15	1841.57
				21	1882.9	24.7218	4.15	1890.78
				IsoLine	IsoLine	IsoLine	3.85	1890.78
							3.85	1841.57
							ErrBox	ErrBox
							4.85	1873.41
							5.15	1873.41
							5.15	1923.61
							4.85	1923.61
							4.85	1873.41
							ErrBox	ErrBox
							5.85	1857.84
							6.15	1857.84
							6.15	1906.95
							5.85	1906.95
							5.85	1857.84
							ErrBox	ErrBox
							6.85	1852.07
							7.15	1852.07
							7.15	1901.05
							6.85	1901.05
							6.85	1852.07
							ErrBox	ErrBox
							7.85	1802.03
							8.15	1802.03
							8.15	1850.77
							7.85	1850.77
							7.85	1802.03
							ErrBox	ErrBox
							8.85	1844.77
							9.15	1844.77
							9.15	1893.59
							8.85	1893.59
							8.85	1844.77
							ErrBox	ErrBox
							9.85	1896.05
							10.15	1896.05
							10.15	1946.02
							9.85	1946.02
							9.85	1896.05
							ErrBox	ErrBox
							10.85	1864.94
							11.15	1864.94
							11.15	1915.3
							10.85	1915.3
							10.85	1864.94
							ErrBox	ErrBox
							11.85	1848.2
							12.15	1848.2
							12.15	1897.06
							11.85	1897.06
							11.85	1848.2
							ErrBox	ErrBox
							12.85	1862.63
							13.15	1862.63
							13.15	1911.94
							12.85	1911.94
							12.85	1862.63
							ErrBox	ErrBox
							13.85	1851.66
							14.15	1851.66
							14.15	1900.59
							13.85	1900.59
							13.85	1851.66
							ErrBox	ErrBox
							14.85	1847.48
							15.15	1847.48
							15.15	1896.71
							14.85	1896.71
							14.85	1847.48
							ErrBox	ErrBox
							15.85	1843.55
							16.15	1843.55
							16.15	1892.35
							15.85	1892.35
							15.85	1843.55
							ErrBox	ErrBox
							16.85	1903.29
							17.15	1903.29
							17.15	1954.3
							16.85	1954.3
							16.85	1903.29
							ErrBox	ErrBox
							17.85	1865.19
							18.15	1865.19
							18.15	1914.53
							17.85	1914.53
							17.85	1865.19
							ErrBox	ErrBox
							18.85	1857.58
							19.15	1857.58
							19.15	1909.32
							18.85	1909.32
							18.85	1857.58
							ErrBox	ErrBox
							19.85	1891.55
							20.15	1891.55
							20.15	1941.82
							19.85	1941.82
							19.85	1891.55
							ErrBox	ErrBox
							20.85	1858.18
							21.15	1858.18
							21.15	1907.62
							20.85	1907.62
							20.85	1858.18
							ErrBox	ErrBox

## Sheet: Table S1
Table S1. Zircon U-Pb dating and Hf-O isotopic results of the Neoarchean and Paleoproterozoic granitoids in the Longjiang area
Sample#Spot		SIMS U-Pb dating																						LA-MC-ICP-MS Hf isotope													SIMS O isotope
		[U] ppm	[Th] ppm	[Pb] ppm	Th/U		conventional concordia columns (Pbc corr.)					TW concordia columns (Pbc corr.)					207Pb	±σ	207Pb	±σ	206Pb	±σ		t (Ma)	176Yb/177Hf	176Lu/177Hf	176Hf/177Hf	2σm	εHf(0)	εHf(t)	2σ	TDM1(Hf) (Ma)	TDM2(Hf) (Ma)	2σ (TDM2)	fLu/Hf		δ18O (‰)	2σ
							207Pb	±σ	206Pb	±σ	ρ	238U	±σ	207Pb	±σ
							235U	%	238U	%		206Pb	%	206Pb	%		206Pb		235U		238U
19LJ1-2#01		320.96	171.341	203.928	0.533841		11.3309	1.60023	0.481277	1.51908	0.949287	2.07781	1.51908	0.170754	0.503132		2565.04	8.3905	2550.76	15.0417	2532.83	31.8956		2565.04	0.0175625	0.000622478	0.281198	2.85502e-05	-55.675	0.844542	1.0155	2833.55	2998.54	38.4071	-0.981251		6.35995	0.207075
19LJ1-2#02		148.028	78.9724	95.1524	0.533495		11.4071	1.70982	0.487512	1.60706	0.939902	2.05123	1.60706	0.169703	0.583807		2554.71	9.74114	2557.01	16.0887	2559.9	34.0425		2554.71	0.0123259	0.000435566	0.281202	2.878e-05	-55.5067	1.10413	1.02365	2813.6	2974.73	38.54	-0.986881		6.28694	0.238929
19LJ1-2#03		491.977	265.945	288.033	0.540564		9.94417	1.54968	0.446166	1.51005	0.974426	2.24132	1.51005	0.161648	0.348227		2472.97	5.86561	2429.62	14.399	2378.18	30.1024
19LJ1-2#04		327.914	180.611	208.972	0.550788		11.3774	1.56168	0.480513	1.50553	0.964048	2.08111	1.50553	0.171726	0.41498		2574.54	6.91756	2554.57	14.6815	2529.5	31.5765		2574.54	0.0170319	0.000604734	0.281181	2.60199e-05	-56.2664	0.496215	0.925516	2854.74	3027.11	34.9718	-0.981785		6.42501	0.213655
19LJ1-2#05		1027.17	24.4728	383.849	0.0238255		5.21922	1.51311	0.333545	1.50162	0.992408	2.99809	1.50162	0.113488	0.186101		1856	3.35894	1855.76	12.9761	1855.54	24.2574
19LJ1-2#06		124.477	63.8433	73.7359	0.512892		9.92212	1.65079	0.453216	1.55477	0.941835	2.20645	1.55477	0.158781	0.55479		2442.72	9.36227	2427.57	15.3425	2409.53	31.3339
19LJ1-2#07		253.772	165.347	162.667	0.651557		11.0197	1.65647	0.475561	1.63298	0.985819	2.10278	1.63298	0.16806	0.277977		2538.41	4.65387	2524.8	15.5385	2507.9	34.0167		2538.41	0.00797579	0.00030247	0.281253	1.5166e-05	-53.7205	2.75835	0.539403	2736.59	2861.06	20.2639	-0.990889		5.90854	0.282589
19LJ1-2#09		365.235	192.934	229.097	0.528247		11.1313	1.58824	0.476587	1.51693	0.955103	2.09825	1.51693	0.169397	0.470556		2551.69	7.85897	2534.19	14.9063	2512.38	31.6398		2551.69	0.0167864	0.000597167	0.281194	3.13961e-05	-55.8053	0.45439	1.11669	2836.66	3012.06	42.2063	-0.982013		6.48341	0.25627
19LJ1-2#10		222.519	169.885	146.922	0.763463		11.2862	1.52731	0.476182	1.50024	0.982281	2.10004	1.50024	0.171899	0.286238		2576.22	4.77427	2547.06	14.3467	2510.61	31.2728		2576.22	0.0214683	0.000745658	0.281199	3.27745e-05	-55.6317	0.925789	1.16578	2840.93	3002.19	44.2305	-0.97754		6.4058	0.225005
19LJ1-2#11		241.345	158.745	141.355	0.657753		9.54619	1.54424	0.435753	1.50353	0.973638	2.29488	1.50353	0.158887	0.352238		2443.85	5.95048	2392	14.2932	2331.6	29.4838
19LJ1-2#12		370.877	211.876	209.009	0.571285		9.40008	1.61335	0.42587	1.51773	0.940733	2.34814	1.51773	0.160086	0.547163		2456.57	9.22105	2377.84	14.9155	2287.07	29.2884
19LJ1-2#13		129.295	62.1144	78.2858	0.48041		10.8117	1.62271	0.465207	1.53817	0.947905	2.14958	1.53817	0.168556	0.51692		2543.36	8.63803	2507.07	15.1949	2462.51	31.5597		2543.36	0.0164273	0.000571259	0.28119	2.31134e-05	-55.962	0.152425	0.822076	2840.72	3024.08	31.0449	-0.982793		6.39	0.27715
19LJ1-2#14		368.631	165.852	222.977	0.449913		10.7674	1.54412	0.468745	1.50305	0.9734	2.13336	1.50305	0.1666	0.353779		2523.77	5.92888	2503.26	14.4487	2478.06	30.9974
19LJ1-2#16		454.454	202.777	284.673	0.446199		11.383	1.61287	0.483491	1.56969	0.973231	2.06829	1.56969	0.170752	0.370687		2565.03	6.18652	2555.03	15.167	2542.46	33.0636
19LJ1-2#17		141.367	80.6745	92.2913	0.570675		11.6357	1.66914	0.489359	1.50228	0.900035	2.04349	1.50228	0.17245	0.727439		2581.57	12.096	2575.55	15.728	2567.9	31.8986		2581.57	0.0160176	0.00055362	0.281202	3.45183e-05	-55.5387	1.47765	1.22782	2823.36	2972.64	46.3635	-0.983325		6.05785	0.244109
19LJ1-2#19		453.746	265.178	285.418	0.584421		10.9921	1.56543	0.472135	1.52985	0.977272	2.11804	1.52985	0.168854	0.331858		2546.31	5.54988	2522.46	14.6752	2492.92	31.7069		2546.31	0.0191051	0.000627122	0.281201	1.98864e-05	-55.5487	0.538471	0.707304	2829.09	3002.79	26.7547	-0.981111		6.03979	0.168513
19LJ1-2#20		824.198	425.356	478.773	0.516085		9.8515	1.5747	0.445234	1.5047	0.955544	2.24601	1.5047	0.160477	0.4643		2460.69	7.82513	2420.98	14.6205	2374.03	29.952
19LJ1-2#21		148.495	124.689	100.479	0.839689		11.3864	1.61427	0.482791	1.50866	0.934578	2.07129	1.50866	0.171052	0.574292		2567.96	9.57053	2555.32	15.1807	2539.41	31.7438		2567.96	0.0122542	0.000406829	0.281178	2.51998e-05	-56.3634	0.595089	0.896334	2843.92	3016.02	33.6996	-0.987746		5.89174	0.288759
19LJ3-5#01		318.778	97.3844	129.512	0.305492		5.33802	1.55635	0.337517	1.50011	0.963866	2.96282	1.50011	0.114705	0.414595		1875.26	7.45532	1874.97	13.3976	1874.71	24.449		1875.26	0.0106453	0.000370969	0.281443	2.04897e-05	-47.0148	-5.67168	0.727643	2487.05	2869.52	27.5564	-0.988826		8.30134	0.224208
19LJ3-5#02		68.1421	23.2007	28.3509	0.340475		5.40111	1.75051	0.34162	1.51136	0.863382	2.92723	1.51136	0.114667	0.883224		1874.66	15.8385	1885.03	15.1095	1894.46	24.8564		1874.66	0.00536504	0.000193758	0.281508	2.29233e-05	-44.6866	-3.12311	0.814065	2387.58	2712.13	30.7443	-0.994164		8.47239	0.242049
19LJ3-5#03		176.083	26.969	69.2091	0.153161		5.36526	1.65943	0.339092	1.51749	0.914465	2.94905	1.51749	0.114755	0.671513		1876.04	12.0554	1879.33	14.3027	1882.3	24.8191															8.59	0.26
19LJ3-5#04		292.166	131.081	165.396	0.448653		9.30424	2.14563	0.441563	1.89872	0.884922	2.26468	1.89872	0.152822	0.999307		2377.75	16.932	2368.44	19.8651	2357.63	37.6014
19LJ3-5#05		564.737	250.573	232.643	0.443699		5.20441	1.5728	0.331274	1.50509	0.956948	3.01865	1.50509	0.113942	0.456522		1863.21	8.21907	1853.34	13.4852	1844.55	24.1888		1863.21	0.00669093	0.000252524	0.281514	2.37078e-05	-44.4713	-3.24003	0.841901	2383	2710.59	31.8484	-0.992394		8.92572	0.40604
19LJ3-5#06		25.6749	8.0501	10.5106	0.313539		5.51236	2.12762	0.339068	1.5587	0.732602	2.94926	1.5587	0.11791	1.44818		1924.78	25.7278	1902.52	18.4528	1882.19	25.4931		1924.78	0.00499528	0.000182637	0.281514	2.21068e-05	-44.481	-1.76589	0.785158	2379.1	2666.79	29.6449	-0.994499		8.27541	0.260571
19LJ3-5#07		328.484	39.4815	126.785	0.120193		5.34033	1.56205	0.335336	1.50013	0.960362	2.98208	1.50013	0.115501	0.435432		1887.72	7.81735	1875.34	13.4479	1864.2	24.3309		1887.72	0.0121042	0.000454627	0.281617	3.3717e-05	-40.8573	0.685949	1.19741	2257.29	2487.02	45.6486	-0.986306		8.30433	0.176909
19LJ3-5#08		360.577	148.626	206.233	0.41219		9.71028	1.9414	0.447946	1.58204	0.814898	2.23241	1.58204	0.157219	1.12524		2425.97	18.9581	2407.68	18.0313	2386.11	31.6282
19LJ3-5#09		60.7564	25.1944	25.4597	0.414679		5.50003	1.87874	0.338531	1.50082	0.798847	2.95394	1.50082	0.117832	1.13012		1923.61	20.1184	1900.6	16.2712	1879.6	24.5156															7.2765	0.3503
19LJ3-5#10		40.7103	1.68344	15.6335	0.0413518		5.46382	2.13016	0.340618	1.54058	0.723221	2.93584	1.54058	0.11634	1.47112		1900.73	26.2063	1894.93	18.4497	1889.64	25.2822		1900.73	0.00709	0.000246777	0.281495	2.32509e-05	-45.1575	-3.0733	0.825746	2408.7	2728.96	31.2147	-0.992567		8.00511	0.27279
19LJ3-5#11		144	29.1297	56.8091	0.20229		5.33629	1.73405	0.335695	1.54016	0.88819	2.9789	1.54016	0.115291	0.796753		1884.43	14.2786	1874.69	14.9378	1865.92	25.0014		1884.43	0.00867892	0.000326029	0.281483	2.81641e-05	-45.571	-3.95803	1.0002	2429.32	2771.02	37.8774	-0.99018		8.68833	0.240382
19LJ3-5#12		201.184	74.9668	83.8977	0.372628		5.50917	1.84366	0.339273	1.5102	0.819133	2.94748	1.5102	0.11777	1.05753		1922.66	18.8364	1902.03	15.9691	1883.17	24.7096
19LJ3-5#13		155.52	28.6744	61.0472	0.184378		5.31257	1.69517	0.336507	1.50524	0.887962	2.97171	1.50524	0.114501	0.779634		1872.05	13.994	1870.89	14.5901	1869.84	24.4778															8.00012	0.205837
19LJ3-5#14		319.235	158.316	149.685	0.495924		6.3054	1.60346	0.369556	1.52151	0.948892	2.70595	1.52151	0.123746	0.506057		2010.93	8.95089	2019.2	14.1508	2027.31	26.5209
19LJ3-5#16		365.307	178.926	172.422	0.489798		6.60929	1.68707	0.372678	1.50012	0.889184	2.68328	1.50012	0.128623	0.771922		2079.24	13.5258	2060.59	14.9891	2041.99	26.3084
19LJ3-5#17		54.6377	11.0519	21.6957	0.202277		5.39727	1.87069	0.337894	1.50129	0.80253	2.95951	1.50129	0.115849	1.11608		1893.13	19.942	1884.42	16.1533	1876.53	24.4887		1893.13	0.00571556	0.000191107	0.28151	3.02747e-05	-44.6216	-2.63589	1.07518	2384.95	2696.21	40.6067	-0.994244		7.36976	0.249981
19LJ3-5#18		231.352	142.509	132.383	0.615986		8.99932	1.70819	0.429913	1.5481	0.906278	2.32605	1.5481	0.15182	0.722021		2366.52	12.2678	2337.94	15.7313	2305.33	30.0746
19LJ3-5#19		37.9534	15.4933	16.0311	0.40822		5.44509	2.28322	0.342641	1.50198	0.657832	2.91851	1.50198	0.115256	1.71964		1883.9	30.6492	1891.98	19.7777	1899.36	24.7568		1883.9	0.00603855	0.00022073	0.281424	2.35201e-05	-47.6786	-5.95267	0.835276	2502.62	2893.4	31.4995	-0.993352		7.81161	0.222597
19LJ3-1#01		2827.59	529.22	1088.72	0.187163		5.11178	1.56618	0.329696	1.51278	0.965903	3.0331	1.51278	0.112449	0.405493		1839.37	7.3237	1838.06	13.3886	1836.91	24.2254		1839.37	0.0146478	0.000503014	0.281324	1.62824e-05	-51.2117	-10.8579	0.578183	2655.37	3160.91	21.9042	-0.984849		6.98612	0.274229
19LJ3-1#03		2343.99	431.645	864.48	0.18415		4.91108	1.54111	0.316014	1.50122	0.974117	3.16441	1.50122	0.112712	0.348362		1843.59	6.29081	1804.16	13.0849	1770.24	23.2806
19LJ3-1#04		3488.62	197.564	1308.4	0.0566309		5.14169	1.55335	0.332181	1.51192	0.973329	3.0104	1.51192	0.112261	0.356358		1836.34	6.44055	1843.02	13.2909	1848.95	24.3488		1836.34	0.0128845	0.000461021	0.281338	2.07863e-05	-50.7155	-10.3756	0.738108	2633.65	3129.04	27.9451	-0.986114		7.25641	0.253269
19LJ3-1#05		2655.41	538.12	1045.95	0.20265		5.24196	1.55122	0.335841	1.50581	0.970722	2.9776	1.50581	0.113203	0.372612		1851.47	6.72132	1859.47	13.3144	1866.63	24.4506		1851.47	0.0138093	0.000482867	0.281319	2.02062e-05	-51.3718	-10.7224	0.717536	2660.08	3161.74	27.1673	-0.985456		7.12639	0.299705
19LJ3-1#06		2193.58	476.373	859.044	0.217166		5.14972	1.54506	0.332773	1.50261	0.972527	3.00505	1.50261	0.112237	0.359678		1835.94	6.50075	1844.35	13.223	1851.81	24.2311		1835.94	0.0148831	0.000514109	0.281324	2.07163e-05	-51.2046	-10.9414	0.735623	2655.86	3163.44	27.8784	-0.984515		6.63417	0.326029
19LJ3-1#07		2056.92	467.096	796.488	0.227085		5.1092	1.54927	0.328398	1.50668	0.97251	3.04508	1.50668	0.112837	0.360767		1845.6	6.51275	1837.64	13.242	1830.61	24.056		1845.6	0.0172024	0.000592928	0.281315	2.24092e-05	-51.5368	-11.1568	0.795754	2673.92	3183.92	30.2099	-0.982141		6.86009	0.271056
19LJ3-1#08		2113.79	413.272	764.705	0.195512		4.85714	1.58716	0.312164	1.54031	0.970486	3.20344	1.54031	0.112849	0.382753		1845.79	6.90857	1794.85	13.453	1751.35	23.6657
19LJ3-1#09		2556.88	143.8	943.542	0.0562403		5.0754	1.5548	0.32692	1.51461	0.974147	3.05885	1.51461	0.112597	0.351253		1841.75	6.34432	1832	13.2751	1823.44	24.1005		1841.75	0.00886942	0.000304663	0.281334	1.52958e-05	-50.8363	-10.1813	0.543153	2627.67	3121.25	20.4802	-0.990823		7.3533	0.333216
19LJ3-1#10		2682.62	492.474	1023.97	0.183579		5.09141	1.57416	0.327062	1.5227	0.967312	3.05753	1.5227	0.112904	0.399188		1846.67	7.20374	1834.68	13.4484	1824.12	24.2375		1846.67	0.0184	0.000636831	0.281324	1.79057e-05	-51.1955	-10.8448	0.635837	2663.93	3165.58	24.17	-0.980818		7.12939	0.323063
19LJ3-1#11		2917.53	466.316	1119.02	0.159833		5.14057	1.54949	0.330705	1.51127	0.975335	3.02384	1.51127	0.112738	0.342022		1844.01	6.17624	1842.84	13.2572	1841.8	24.2569		1844.01	0.0185003	0.000670619	0.28132	2.02702e-05	-51.3496	-11.1009	0.719796	2672.14	3179.27	27.3828	-0.979801		7.22264	0.16473
19LJ3-1#12		2277.04	324.978	865.09	0.14272		5.11384	1.56624	0.329112	1.51943	0.97011	3.03848	1.51943	0.112694	0.380071		1843.31	6.86233	1838.41	13.3901	1834.07	24.2996		1843.31	0.0148193	0.000516881	0.281317	1.98993e-05	-51.4602	-11.0363	0.706626	2665.77	3174.83	26.7758	-0.984431		7.01718	0.18982
19LJ3-1#13		2318.98	381.656	879.188	0.164579		5.07933	1.54974	0.326587	1.511	0.975004	3.06197	1.511	0.112799	0.344332		1845	6.21713	1832.66	13.2332	1821.82	24.0246		1845	0.0157483	0.000574455	0.281316	2.22895e-05	-51.4838	-11.0939	0.791504	2670.63	3179.62	30.0358	-0.982697		7.02765	0.25076
19LJ3-1#14		1938.1	357.591	741.065	0.184506		5.08369	1.56127	0.327891	1.5217	0.97465	3.04979	1.5217	0.112447	0.349314		1839.34	6.31123	1833.39	13.3343	1828.15	24.2678		1839.34	0.0153554	0.000535243	0.281312	1.73881e-05	-51.6427	-11.3314	0.617444	2673.98	3189.92	23.4037	-0.983878		7.07004	0.178798
19LJ3-1#15		2744.53	435.167	1054.6	0.158558		5.1521	1.54676	0.331677	1.51017	0.976346	3.01498	1.51017	0.112659	0.334427		1842.75	6.0403	1844.74	13.2386	1846.5	24.2929		1842.75	0.0136834	0.000493514	0.281303	2.09956e-05	-51.9631	-11.5248	0.745553	2683.29	3204.37	28.2246	-0.985135		7.03713	0.232175
Standards
Qinghu#01		2002.83	810.455	59.4158	0.404656		0.171387	2.13572	0.0252617	1.5002	0.702434	39.5856	1.5002	0.0492054	1.5201		157.632	35.1942	160.622	3.17783	160.825	2.38329
Qinghu#02		2153.46	1098.32	66.3837	0.510025		0.172783	1.6908	0.0255481	1.50001	0.887161	39.1418	1.50001	0.0490502	0.780239		150.234	18.184	161.831	2.53249	162.625	2.40934
Qinghu#03		1626.97	917.136	50.4209	0.563706		0.171856	1.90251	0.0252486	1.52007	0.79898	39.6062	1.52007	0.0493659	1.14409		165.248	26.522	161.029	2.83697	160.742	2.41363
Qinghu#04		888.095	399.745	25.9099	0.450116		0.168362	1.91244	0.0244872	1.55795	0.814639	40.8377	1.55795	0.0498658	1.10915		188.744	25.6083	157.996	2.80209	155.953	2.40095
Qinghu#05		840.42	428.428	25.7173	0.509778		0.176292	2.13022	0.0252298	1.53966	0.722771	39.6356	1.53966	0.0506776	1.47217		226.191	33.6737	164.864	3.24687	160.624	2.44298
Qinghu#06		2534.01	961.486	74.7282	0.379433		0.172039	1.7156	0.0250748	1.50611	0.87789	39.8808	1.50611	0.0497609	0.821535		183.84	19.0233	161.187	2.56022	159.649	2.37539
Qinghu#07		2222.86	1016.05	66.4687	0.457092		0.169757	1.74244	0.0249603	1.53366	0.880176	40.0636	1.53366	0.0493262	0.827045		163.364	19.222	159.208	2.57082	158.929	2.40808
Qinghu#08		3120.22	1552.93	94.5843	0.4977		0.169766	1.74864	0.0250307	1.50223	0.859088	39.9509	1.50223	0.04919	0.895002		156.898	20.8161	159.216	2.58008	159.372	2.36522
Qinghu#09		1733.81	754.686	51.2183	0.435275		0.170543	2.01751	0.0248075	1.52496	0.755863	40.3104	1.52496	0.0498597	1.32092		188.456	30.4538	159.89	2.98903	157.968	2.38011
Qinghu#01																																					5.17436	0.265381
Qinghu#02																																					5.51852	0.262935
Qinghu#03																																					5.45018	0.182914
Qinghu#04																																					5.30408	0.33752
Qinghu#05																																					5.51509	0.168592
Qinghu#06																																					5.45884	0.187004
Qinghu#07																																					5.32244	0.335086
Qinghu#08																																					5.5475	0.289161
Qinghu#09																																					5.06825	0.261859
Qinghu#10																																					5.39988	0.154419
The analytical results in the same row come from the same laser ablation position on the same zircon grain.
Initial 176Hf/177Hf values are expressed as εHf(t), which is calculated using a decay constant value of 1.867×10-11 yr-1(Scherer et al., 2001), giving 176Hf/177Hf(CHUR, today) and 176Lu/177Hf(CHUR, today) of 0.282772 and 0.0332, respectively (Blichert-Toft and Albarède, 1997). For the calculation of Hf isotopic model ages, the global depleted mantle value is used as the juvenile end-member, with …
References: Blichert-Toft, J., and Albarède, F., 1997, The Lu-Hf isotope geochemistry of chondrites and the evolution of the mantle-crust system: Earth And Planetary Science Letters, v. 148, p. 243–258. Griffin, W.L., Pearson, N.J., Belousova, E., Jackson, S.E., Achterbergh, E.V., O’Reilly, S.Y., and Shee, S.R., 2000, The Hf isotope composition of cratonic mantle: LAM-MC-ICPMS analysis of zircon …
