# Supplementary material
Source: publisher figshare collection journal article supplement (https://gsapubs.figshare.com/articles/dataset/_/25438687)
Supplement: Supplementary file 1 [file 1]

Sun, C.Y., Xu, W.L., Zhao, G.C., Zhang, X.M., Li, Y., and Tang, J., 2024, Neoarchean and Paleoproterozoic magmatism in the Longjiang area, NE China: Implications for the recycling history of supracrustal components in the eastern Central Asian Orogenic Belt: GSA Bulletin, <https://doi.org/10.1130/B37428.1>

## Supplemental Material

**Text S1.** Detailed analytical methods.

**Figure S1.** Apatite chondrite-normalized REE patterns for 1881 Ma monzogranites and 1843 Ma syenogranites.

**Figure S2.** Apatite-based adakite discrimination diagrams.

**Figure S3.** Correlations among  $\delta\text{Eu}$  and Rb, Sr, and Ba.

**Figure S4.** Correlations between  $\delta\text{Eu}$  and typical supracrust indicators.

**Table S1.** Zircon U-Pb dating and Hf-O isotopic results of the Neoarchean and Paleoproterozoic granitoids in the Longjiang area.

**Table S2.** Whole-rock geochemical compositions of the Neoarchean and Paleoproterozoic igneous rocks in the Longjiang area.

**Text S1.** Detailed analytical methods.

## **1. Secondary Ion Mass Spectrometry (SIMS) Zircon U-Pb Dating**

U, Th, and Pb were measured using the Cameca IMS-1280 SIMS at the Institute of Geology and Geophysics, Chinese Academy of Sciences, Beijing, China (IGGCAS). Analytical procedures are the same as those described by [Li et al. \(2009\)](#). The ellipsoidal spot is about  $10 \times 15 \mu\text{m}$  in size. Pb/U fractionation was calibrated with the power relationship between  $^{206}\text{Pb}/^{238}\text{U}$  and  $^{238}\text{U}^{16}\text{O}_2/^{238}\text{U}$  against zircon standard Plešovice ([Sláma et al., 2008](#)); calibration of U and Th abundance was performed relative to the zircon standard 91500 ([Wiedenbeck et al., 1995](#)). Measured compositions were corrected for common Pb using non-radiogenic  $^{204}\text{Pb}$ . Corrections are sufficiently small to be insensitive to the choice of common Pb composition, and an average of present-day crustal composition ([Stacey and Kramers, 1975](#)) is used for the common Pb, assuming that the common Pb is largely surface contamination introduced during sample preparation. For more details on calibration methods, refer to [Li et al. \(2010b\)](#). Analytical results are listed in [Table S1](#), and uncertainties for individual isotopic data analyses are reported as  $1\sigma$ . Data processing was carried out using the Isoplot 4.15 program ([Ludwig, 2012](#)). To ascertain the veracity of measurements calibrated against the Plešovice standard, Qinghu was alternately analyzed as an unknown. Nine measurements on Qinghu yield a Concordia age of  $159.6 \pm 1.6 \text{ Ma}$ , identical within errors to the recommended value of  $159.5 \pm 0.2 \text{ Ma}$  ([Li et al., 2013](#)).

## **2. Whole-Rock Major and Trace Elements**

The samples for whole-rock analyses were crushed in an agate mill to 200 mesh after removing weathered surfaces. X-ray fluorescence (XRF; Rigaku RIX 2100 spectrometer) using fused-glass disks and ICP-MS (Agilent 7500a with a shield torch) were used to measure the major and trace elements compositions, respectively, at the Wuhan Sample Solution Analytical Technology Co., Ltd, Hubei Province, China. The samples were digested in Teflon bombs with a mixture of  $\text{HF} + \text{HNO}_3$  for ICP-MS analyses. Analytical uncertainties are in the range of 1–3%. The detailed procedures are the same as the descriptions by [Liu et al. \(2008\)](#). The analytical results for the reference materials, GBW07103 (granite), GBW07105 (basalt), GBW07111 (granodiorite), AGV-2 (andesite), BCR-2 (basalt), BHVO-2 (basalt), and RGM-2 (rhyolite), indicate that the analytical precision for major elements is better than 5%, and for trace elements, generally better than 10%. The whole-rock geochemical results and international standards are listed in [Table S2](#).

## **3. Zircon Hf Isotope**

*In situ* zircon Hf isotope analyses were performed using a Neptune MC-ICP-MS with an ArF excimer laser ablation system (193 nm) at the Wuhan Sample Solution Analytical Technology Co., Ltd, Hubei Province, China. This laser ablation system includes a “wire” signal smoothing device, producing smooth signals even at very low laser repetition rates down to 1 Hz ([Hu et al., 2012b](#)). Helium was used as the carrier gas within the ablation cell and was merged with argon (makeup gas) after the ablation cell. Small amounts of nitrogen were added to the argon makeup gas flow to improve the sensitivity of Hf isotopes ([Hu et al., 2008](#)). Compared with the standard arrangement, the addition of nitrogen in combination with a newly designed X-skimmer cone and Jet sample cone in Neptune Plus improved the signal intensities of Hf, Yb,

and Lu by factors of 5.3, 4.0, and 2.4, respectively. All data were acquired on zircon in single-spot ablation mode with a spot size of 44  $\mu\text{m}$ . Each measurement consisted of 20 seconds of acquisition of the background signal followed by 50 seconds of acquisition of the ablation signal. For details of the operating conditions for the laser ablation system, the MC-ICP-MS instrument, and the analytical method, see [Hu et al. \(2012a\)](#). The results of Hf isotopic analyses are presented in [Table S1](#).

#### 4. Zircon O Isotope

Zircon oxygen isotopes were measured using the same Cameca IMS1280 ion microprobe at IGGCAS. The  $\text{Cs}^+$  primary ion beam was accelerated at 10 kV, with an intensity of *ca.* 2 nA. The Gaussian mode was applied with a primary beam aperture of 200  $\mu\text{m}$  to reduce aberrations. The analytical spot is 10 $\times$ 15  $\mu\text{m}$  in size. In order to compensate for sample charging during analysis, a normal incidence electron flood gun was applied with homogeneous electron density over a 100  $\mu\text{m}$  elliptical area. A 10 kV potential was used to extract negative secondary ions. A multicollection mode was adopted to measure oxygen isotope compositions. A mass resolution of *ca.* 2500 can be obtained to measure oxygen isotopes. Each analysis comprises 20 cycles, with an internal precision better than 0.2‰ (1 $\sigma$ ). Detailed analytical procedures and calibration of instrumental mass fractionation refer to [Li et al. \(2010a\)](#). Measured  $^{18}\text{O}/^{16}\text{O}$  is normalized using the Vienna Standard Mean Ocean Water compositions (VSMOW;  $^{18}\text{O}/^{16}\text{O} = 0.0020052$ ) and reported in standard per mil notation. The instrumental mass fraction factor (IMF) is accounted for using the Penglai zircon standard with  $\delta^{18}\text{O}_{\text{VSMOW}} = 5.31\text{‰} \pm 0.10\text{‰}$  (2 $\sigma$ ; [Li et al., 2010b](#)). Analytical results are listed in [Table S1](#). Qinghu was analyzed as an unknown to monitor the external precision during analysis. Ten measurements of Qinghu yielded a mean  $\delta^{18}\text{O} = 5.41\text{‰} \pm 0.10\text{‰}$  (2 $\sigma$ ), which is within uncertainty indistinguishable from the reported value of  $\delta^{18}\text{O} = 5.4\text{‰} \pm 0.2\text{‰}$  (2 $\sigma$ ; [Li et al., 2013](#)).

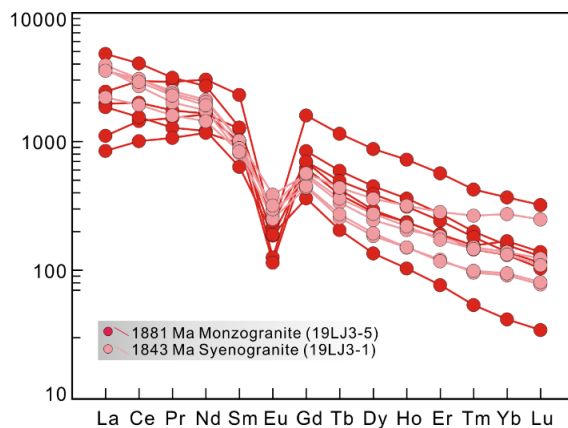

**Figure S1.** Apatite chondrite-normalized REE patterns for 1881 Ma monzogranites and 1843 Ma syenogranites. Chondrite values after [Boynton \(1984\)](#).

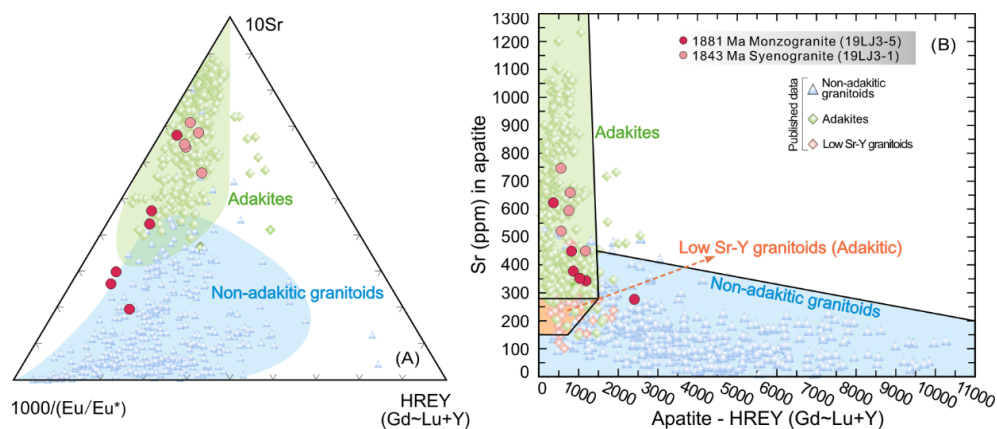

**Figure S2.** Apatite-based adakite discrimination diagrams (after Sun et al., 2022).

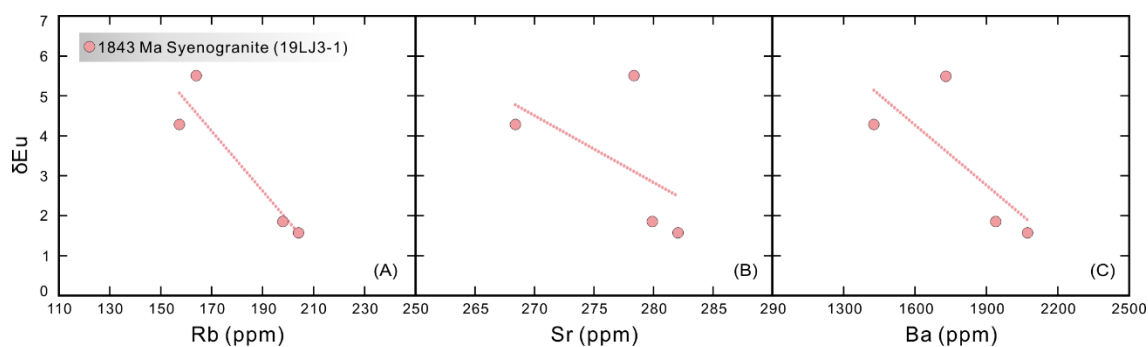

**Figure S3.** Correlations among  $\delta\text{Eu}$  and Rb, Sr, and Ba.

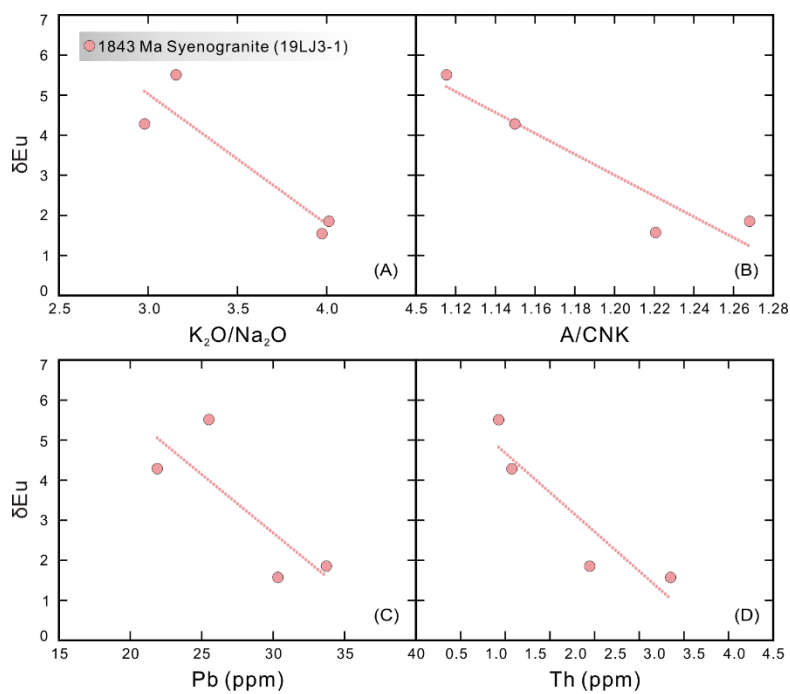

**Figure S4.** Correlations between  $\delta\text{Eu}$  and typical supracrust indicators.

## References Cited

- Boynnton, W., 1984, Cosmochemistry of the Rare Earth Elements: Meteorite Studies, *in* Henderson, P., ed., Rare Earth Element Geochemistry: Amsterdam, Elsevier, p. 62-114.
- Hu, Z.C., Gao, S., Liu, Y.S., Hu, S.H., Chen, H.H., and Yuan, H.L., 2008, Signal enhancement in laser ablation ICP-MS by addition of nitrogen in the central channel gas: *Journal of Analytical Atomic Spectrometry*, v. 23, p. 1093-1101, <https://doi.org/10.1039/b804760j>.
- Hu, Z.C., Liu, Y.S., Gao, S., Liu, W.G., Zhang, W., Tong, X.R., Lin, L., Zong, K.Q., Li, M., Chen, H.H., Zhou, L., and Yang, L., 2012a, Improved Hf isotope ratio analysis of zircon using newly designed X skimmer cone and jet sample cone in combination with the addition of nitrogen by laser ablation multiple collector ICP-MS: *Journal of Analytical Atomic Spectrometry*, v. 27, p. 1391-1399, <https://doi.org/10.1039/c2ja30078h>.
- Hu, Z.C., Liu, Y.S., Gao, S., Xiao, S.Q., Zhao, L.S., Günther, D., Li, M., Zhang, W., and Zong, K.Q., 2012b, A "wire" signal smoothing device for laser ablation inductively coupled plasma mass spectrometry analysis: *Spectrochimica Acta Part B-Atomic Spectroscopy*, v. 78, p. 50-57, <https://doi.org/10.1016/j.sab.2012.09.007>.
- Li, X.H., Li, W.X., Li, Q.L., Wang, X.C., Liu, Y., and Yang, Y.H., 2010a, Petrogenesis and tectonic significance of the ~850 Ma Gangbian alkaline complex in South China: Evidence from zircon U-Pb dating, Hf-O isotopes and whole-rock geochemistry: *Lithos*, v. 114, p. 1-15, <https://doi.org/10.1016/j.lithos.2009.07.011>.
- Li, X.H., Liu, Y., Li, Q.L., Guo, C.H., and Chamberlain, K.R., 2009, Precise determination of Phanerozoic zircon Pb/Pb age by multicollector SIMS without external standardization: *Geochemistry Geophysics Geosystems*, v. 10, Q04010, <https://doi.org/10.1029/2009gc0002607>.
- Li, X.H., Long, W.G., Li, Q.L., Liu, Y., Zheng, Y.F., Yang, Y.H., R., C.K., Wan, D.F., Guo, C.H., Wang, X.C., and Tao, H., 2010b, Penglai zircon megacrysts: A potential new working reference material for microbeam determination of Hf-O isotopes and U-Pb age: *Geostandards and Geoanalytical Research*, v. 34, p. 117-134, <https://doi.org/10.1111/j.1751-908X.2010.00036.x>.
- Li, X.H., Tang, G.Q., Gong, B., Yang, Y.H., Hou, K.J., Hu, Z.C., Li, Q.L., Liu, Y., and Li, W.X., 2013, Qinghu zircon: A working reference for microbeam analysis of U-Pb age and Hf and O isotopes: *Chinese Science Bulletin*, v. 58, p. 4647-4654, <https://doi.org/10.1007/s11434-013-5932-x>.
- Liu, Y.S., Zong, K.Q., Kelemen, P.B., and Gao, S., 2008, Geochemistry and magmatic history of eclogues and ultramafic rocks from the Chinese continental scientific drill hole: Subduction and ultrahigh-pressure metamorphism of lower crustal cumulates: *Chemical Geology*, v. 247, p. 133-153, <https://doi.org/10.1016/j.chemgeo.2007.10.016>.
- Ludwig, K.R., 2012, User's Manual for Isoplot Version 3.75-4.15: A Geochronological Toolkit for Microsoft Excel: Berkeley, Berkeley Geochronology Center Special Publication No. 5, 75 p.
- Sláma, J., Kosler, J., Condon, D.J., Crowley, J.L., Gerdes, A., Hanchar, J.M., Horstwood, M.S.A., Morris, G.A., Nasdala, L., Norberg, N., Schaltegger, U., Schoene, B., Tubrett, M.N., and Whitehouse, M.J., 2008, Plešovice zircon — A new natural reference material for U-Pb and Hf isotopic microanalysis: *Chemical Geology*, v. 249, p. 1-35, <https://doi.org/10.1016/j.chemgeo.2007.11.005>.
- Stacey, J.S., and Kramers, J.D., 1975, Approximation of terrestrial lead isotope evolution by a two-stage model: *Earth and Planetary Science Letters*, v. 26, p. 207-221, [https://doi.org/10.1016/0012-821X\(75\)90088-6](https://doi.org/10.1016/0012-821X(75)90088-6).
- Sun, C.Y., Cawood, P.A., Xu, W.L., Zhang, X.M., Tang, J., Li, Y., Sun, Z.X., and Xu, T., 2022, geochemical composition of apatite in granitoids from the eastern Central Asian Orogenic Belt: A window into petrogenesis: *Geochimica Et Cosmochimica Acta*, v. 317, p. 552-573, <https://doi.org/10.1016/j.gca.2021.10.028>.
- Wiedenbeck, M., Alle, P., Corfu, F., Griffin, W.L., Meier, M., Oberli, F., von Quadt, A., Roddick, J.C., and Spiegel, W., 1995, Three natural zircon standards for U-Th-Pb, Lu-Hf, trace element and REE analyses: *Geostandards Newsletter*, v. 19, p. 1-23, <https://doi.org/10.1111/j.1751-908X.1995.tb00147.x>.
